1 **Timed inhibition of CDC7 increases CRISPR-Cas9 mediated templated repair**

2

3 **Author List**

4 Beeke Wienert<sup>1,2,3</sup>, Sharon J Feng<sup>1,2</sup>, Melissa Locke<sup>2</sup>, David N Nguyen<sup>4</sup>, Stacia K Wyman<sup>1</sup>, Katelynn R  
5 Kazane<sup>1,2</sup>, Alexander Marson<sup>1,4,5</sup>, Christopher D Richardson<sup>1,2,6\*</sup>, Jacob E Corn<sup>1,2,7\*</sup>

6

7 <sup>1</sup>Innovative Genomics Institute, University of California, Berkeley, 94704

8 <sup>2</sup>Department of Molecular and Cell Biology, University of California, Berkeley, CA, 94704

9 <sup>3</sup>Current address: Gladstone Institutes, San Francisco, CA, 94158

10 <sup>4</sup>Department of Microbiology and Immunology, University of California, San Francisco, CA, 94143

11 <sup>5</sup>Department of Medicine, University of California, San Francisco, CA, 94143

12 <sup>6</sup>Current address: Department of Molecular, Cellular, and Developmental Biology, University of  
13 California, Santa Barbara, California, 93106

14 <sup>7</sup>Current address: Department of Biology, ETH Zürich, 8093 Zürich, Switzerland

15 \*Co-corresponding. Correspondence: [jacob.corn@biol.ethz.ch](mailto:jacob.corn@biol.ethz.ch), [chris.richardson@lifesci.ucsb.edu](mailto:chris.richardson@lifesci.ucsb.edu)

16

## 17 **Abstract**

18           Repair of double strand DNA breaks (DSBs) can result in gene disruption or precise gene  
19 modification via homology directed repair (HDR) from a templating donor DNA. During genome editing,  
20 altering cellular responses to DSBs may be an effective strategy to rebalance editing outcomes towards  
21 HDR and away from other repair pathways. To identify factors that regulate HDR from a double-stranded  
22 DNA donor (dsDonor), we utilized a pooled screen to define the consequences of thousands of individual  
23 gene knockdowns during Cas9-initiated HDR from a double strand plasmid donor. We find that templated  
24 dsDonor repair pathways are mostly genetically distinct from single strand donor DNA (ssDonor) repair  
25 but share aspects that include dependency upon the Fanconi Anemia (FA) pathway. We also identified  
26 several factors whose knockdown increases HDR and thus act as repressors of gene modification.  
27 Screening available small molecule inhibitors of these repressors revealed that the cell division cycle 7-  
28 related protein kinase (CDC7) inhibitor XL413 increases the efficiency of HDR by 2-3 fold in many  
29 contexts, including primary T-cells. XL413 stimulates HDR through cell cycle regulation, inducing an  
30 early S-phase cell cycle arrest that, to the best of our knowledge, is uncharacterized for Cas9-induced  
31 HDR. We anticipate that XL413 and other such rationally developed inhibitors will be useful tools for  
32 boosting the efficiency of gene modification.

33

## 34 **Main Text**

35           Genome editing with targeted nucleases, such as CRISPR-Cas9, is a powerful tool for research and a  
36 promising approach for therapeutic treatment of human disease. One strategy for efficient genome editing  
37 in eukaryotic cells introduces a ribonucleotide protein (RNP) complex comprised of the type II  
38 endonuclease Cas9 and a guide RNA (gRNA), which create a double strand DNA break (DSB) at a  
39 targeted location in the genome<sup>1,2</sup>. This DSB is repaired by cellular DNA repair pathways to produce two  
40 outcomes: error-prone sequence disruption by insertion or deletion (indels) at the DSB, or precise  
41 sequence modification via homology directed repair (HDR) that copies a homologous donor DNA into  
42 the DSB. The targeted incorporation of introduced DNA sequences enables ground-breaking research

43 approaches, including endogenous epitope tagging and the insertion of SNPs to test disease causation, and  
44 use of these techniques in human cells promises therapeutics to correct genetic lesions that drive human  
45 disease<sup>3,4</sup>. Strategies to favor precise HDR outcomes over deleterious error-prone repair in human cells  
46 are therefore of intense interest both to improve understanding of biological pathways and enable new  
47 therapeutic options.

48  
49 Human cells have multiple overlapping DSB repair pathways, such as alternative-End Joining (alt-  
50 EJ), synthesis-dependent strand annealing (SDSA), and homology-directed repair, that have been  
51 implicated in Cas9-mediated gene modification<sup>5-7</sup>. To investigate these mechanisms in greater detail, we  
52 previously developed a reporter assay that allowed us to interrogate the genetic requirements of Cas9-  
53 mediated HDR using single stranded donor DNA (ssDonor) and discovered that single strand template  
54 repair (SSTR) requires the Fanconi Anemia (FA) DNA repair pathway<sup>8</sup>. We furthermore found that while  
55 HDR from a double stranded DNA plasmid (dsDonor) depends on Rad51, SSTR does not. These distinct  
56 requirements for HDR from ssDonor and dsDonor implied that different donors produce molecularly  
57 identical gene modifications via different mechanistic routes. To more completely map how different  
58 types of donors mediate Cas9-induced HDR, we used genetic screening to reveal the DNA repair factors  
59 that are involved in HDR using dsDonor DNA (a subset of HDR, from here on termed HR). Here, we  
60 describe genes that up- or down-regulate HR from a double stranded template and find pathways that are  
61 shared with and distinct from SSTR. We furthermore discover factors whose knockdown increases HDR.  
62 Timed administration of a small molecule inhibitor of one of these factors, CDC7, increases HR and SSTR  
63 by 2-3 fold in multiple types of human cells.

64

## 65 **Results**

### 66 **SSTR and HR repair pathways are overlapping**

67 We adapted a previously described pooled screening platform<sup>8</sup> to define the contribution made by  
68 each of thousands of DNA metabolism genes to Cas9-mediated gene replacement using a plasmid donor

69 DNA template. The basis of this platform is the stable expression of three components in each cell: 1) a  
70 dCas9-KRAB CRISPRi construct<sup>9</sup>, 2) a *BFP* reporter gene, and 3) a guide RNA targeting the transcription  
71 start site (TSS) of a single gene. We constructed a guide RNA library to target genes with Gene Ontology  
72 (GO) terms related to DNA metabolism, comprising a library of approximately 2,000 genes at a density  
73 of five guides per TSS<sup>10</sup> [Document S1 GUIDES]. Pooled K562 erythroleukemia cell populations stably  
74 expressing BFP and individually inhibiting a specific DNA metabolism gene were transiently  
75 nucleofected with a Cas9 RNP targeted to introduce a DSB in the *BFP* reporter, together with a plasmid  
76 donor DNA encoding a *GFP* sequence template that will convert BFP to GFP upon successful HR<sup>11</sup>  
77 [Figure 1A]. Edited cell populations (unedited: BFP<sup>+</sup>, HR: GFP<sup>+</sup>, gene disruption: non-fluorescent) were  
78 separated by fluorescence-activated cell sorting (FACS) and the guide RNA frequency in each population  
79 was determined by Illumina sequencing the stably integrated guide RNA cassette. Genes whose up- and  
80 down- regulation altered each repair outcome were determined by comparing the sorted populations to the  
81 starting pool. Similarities between the reagents and techniques used in this screening approach permitted  
82 direct comparison with our earlier screen editing the same locus but utilizing an ssDNA donor<sup>8</sup> [Figure  
83 1A].

84 We identified genes involved in HR by comparing guide RNA frequencies in the GFP<sup>+</sup> population  
85 (*i.e.* cells that had undergone HR) to guide RNA frequencies in the unsorted control population. Guide  
86 RNAs targeting genes that restrict HR were enriched in the GFP<sup>+</sup> population (because their knockdown  
87 favors HR), while guide RNAs targeting genes that are required for HR were depleted from the GFP<sup>+</sup>  
88 population [Figure 1B]. Our dsDonor screen revealed that the Fanconi Anemia (FA) repair pathway is  
89 required for HR, which is similar to the requirement of the FA pathway for Cas9-mediated SSTR<sup>8</sup>. Thirty  
90 one of forty FA and FA-related genes were required for HR, suggesting that this is an activity of the overall  
91 FA pathway [Figure 2A]. While the FA pathway is typically associated with interstrand crosslink repair  
92 and restarting stalled replication forks, our work and those of other labs has consistently indicated that  
93 multiple FA genes play a strong role in HDR from multiple types of DNA templates<sup>12</sup>. While most of the  
94 FA pathway is required for both HR and SSTR, some FA factors are required for one but not the other,

95 such as the FA E2 ubiquitin ligase, UBE2T, or the DNA binding protein, FAAP24. Moreover, components  
96 of the FA core complex including FANCA, FANCE, and FANCF showed different magnitudes of  
97 phenotypes in each screen. These results imply donor-specific functions for FA sub-complexes [**Figure**  
98 **2A**].

99 The shared reliance of Cas9-induced SSTR and HR on the FA pathway motivated us to  
100 systematically explore overlapping genetic dependencies behind these two activities. We curated lists of  
101 statistically significant ( $p < 0.05$ ) genes appearing in the SSTR and HR screens and performed GO term  
102 analysis to define pathways involved in each process<sup>13</sup>. There was substantial overlap between SSTR and  
103 HR: both pathways require Fanconi Anemia Repair, Nucleotide Excision Repair (NER), and Strand  
104 Displacement activities, which is driven by mutual reliance on FA proteins, members of the TFIIH  
105 complex, and the BLM helicase. Shared reliance on these pathways implies that both forms of HDR may  
106 challenge cells to balance NER-like single strand editing activities and templated repair events, as has  
107 been suggested for repair of interstrand crosslinks<sup>14</sup>. Despite these similarities, SSTR and HR are distinct  
108 in notable ways. SSTR but not HR depends on “Negative regulation of transposition”, a GO term  
109 comprising APOBEC3C, D, F, and G. Originally reported as RNA editing enzymes, these enzymes are  
110 known to modify single stranded DNA during gene editing reactions<sup>15</sup>, and similar proteins have been  
111 repurposed as targeted DNA base-editing reagents<sup>16</sup>. Genes uniquely important for HR, on the other hand,  
112 were annotated as “Double Strand Break Repair via Homologous Recombination”, because these genes  
113 are known to play roles in well-studied forms of dsDonor-templated repair, such as meiotic homologous  
114 recombination [**Figure 2B**]. These observations suggest that HDR generally requires the FA pathway, but  
115 HR and SSTR require specialized activities to respond to donor topologies or intermediate structures  
116 specific to each repair process.

117 We also found several sets of genes that repress HR, and whose knockdown enhances HR  
118 efficiency [**Figure 1B**]. Some of these genes are consistent with a model in which NHEJ and HR compete  
119 to repair DSBs, and that inhibition of one pathway may favor the other<sup>17-19</sup>. Examples of these repressor

120 genes include TP53-binding protein 1 (53BP1), X-ray repair cross-complementing protein 4 (XRCC4)  
121 and non-homologous end joining factor 1 (NHEJ1), which interact at DSBs to promote DNA ligase 4  
122 (LIG4) association during non-homologous end-joining (NHEJ)<sup>20</sup>. Other repressors that we identified  
123 have not previously been reported to increase HR efficiency, but have roles in processes have been linked  
124 to DNA repair outcomes, such as cell cycle progression.

## 125 **Inhibiting HR repressors increases both HR and SSTR**

126 Our exploration of genes and pathways involved in HR presented us with a number of candidate  
127 HR repressors whose knockdown increases HR efficiency. However, gene editing is frequently performed  
128 in primary cell types or in experimental contexts where transcriptional or genetic repression of these  
129 factors would be unsuitable. Small molecule treatments that increase HR would be extremely valuable  
130 because HR is quite inefficient in human cells yet desirable for its ability to precisely engineer genomic  
131 sequences and even insert long (>500 bp) sequences such as chimeric antigen receptors during T-cell  
132 engineering<sup>21</sup>. We performed an extensive literature search to find small molecule inhibitors of HR  
133 repressors [**Figure 1B**]. We focused on eight commercially available small molecules that are reported to  
134 inhibit CCND1, CDC7, HIPK2, MAPK14, NOX4, PLK3, PLK1, and 53BP1 [**Extended Data Figure**  
135 **1A**].

136  
137 We first asked if these compounds have an effect on HR or SSTR editing outcomes using a  
138 derivative of the K562 cell line stably expressing a BFP-to-GFP reporter system<sup>11</sup>. Reporter cells were  
139 nucleofected with a Cas9 RNP targeting the BFP reporter gene and either an ssDNA or plasmid dsDNA  
140 donor. Following nucleofection, cells were treated with different inhibitors for 24 hours and then  
141 recovered in drug-free media [**Figure 3A**]. BFP-to-GFP HDR outcomes were monitored by flow  
142 cytometry after four days. We found that cells treated with the CDC7 inhibitor XL413<sup>22</sup> showed a  
143 significant increase in both SSTR and HR [**Figure 3B**]. Inhibition of mitogen-activated protein kinase 14  
144 (MAPK14) with SB220025 slightly enhanced SSTR and inhibition of PLK3 with GW843682X increased

145 both SSTR and HR from a dsDonor, but the effect size was small. All other compounds resulted in no  
146 change or even a reduction of HR, which could be caused by impaired cell fitness. siRNA inhibition of  
147 CDC7 was less effective than small molecule inhibition [**Extended Data Figure 1B**] at promoting HDR,  
148 which suggests that inactivating CDC7 kinase may be more effective as an HDR stimulant than reducing  
149 the levels of CDC7 kinase. The effect of XL413 is concentration dependent, as both SSTR and HR  
150 increased in a dose-dependent manner, with 33  $\mu$ M XL413 increasing HDR 2- to 3-fold [**Figure 3C**].  
151 Importantly, XL413 concentrations up to 33  $\mu$ M and exposure for up to 24h did not result in a notable  
152 decrease in viability in K562 cells [**Extended Data Figure 2A-B**].

### 153 **CDC7 inhibition increases HDR at endogenous loci**

154 We next asked if XL413's ability to stimulate HDR is generally applicable to multiple genomic  
155 loci, cell types, and HDR "cargo" sizes. We used Cas9-induced HR to knock-in a plasmid dsDonor GFP  
156 coding sequence at the C-terminus of three different genes: *lysosomal-associated membrane protein 1*  
157 (*LAMP1*), *fibrillarin (FBL)* and *translocase of outer mitochondrial membrane 20 (TOMM20)*. These  
158 knock-in reagents were previously developed as part of a comprehensive cell-tagging effort in induced  
159 pluripotent stem cells (iPSCs)<sup>23</sup>. We found that treatment with XL413 for 24 hours directly after  
160 nucleofection increased the HR efficiency at *LAMP1*, *FBL* and *TOMM20* by two- to three-fold,  
161 irrespective of the original frequency of HR [**Figure 4A**]. Furthermore, we tested XL413 at the *LAMP1*  
162 locus in HCT116 and HeLa cell lines and found that these cell lines also significantly increased HR to a  
163 similar extent [**Figure 4B**]. These data demonstrate that the XL413 CDC7 inhibitor increases HR  
164 independently of the genomic locus and cell type and can be used for the installation of long sequences  
165 via HR.

166 We investigated if SSTR is similarly increased by CDC7 inhibition at an endogenous locus. We  
167 designed an editing strategy that uses an ssDonor to insert a 2xFLAG tag and linker at the C-terminus of  
168 *TOMM20* [**Figure 4C**]. To avoid re-cutting the repaired locus, we introduced three additional silent  
169 substitutions into the donor template to remove the gRNA recognition site. A hallmark of SSTR is a strong

170 decrease in donor sequence incorporation with increasing distance from the Cas9-cut site<sup>24</sup>. However,  
171 sometimes PAM sites are unavailable at the exact introduction site reducing knock-in efficiencies  
172 dramatically. Increasing SSTR efficiency in such a context would be particularly helpful. We incorporated  
173 this scenario into our experiments by designing the ssDonor so that the tag insertion is 20 bp from the  
174 Cas9 cut site. Using amplicon PCR and next-generation sequencing, we found that XL413-treated cells  
175 again had a two- to three-fold increase in SSTR relative to untreated cells, significantly boosting the  
176 insertion of the FLAG-tag, despite its distance from the Cas9-cut site **[Figure 4D]**. Sequence-level  
177 increases in tag insertion corresponded to increased ability to detect FLAG-tagged TOMM20 by Western  
178 blotting **[Figure 4E]**. These findings suggest that CDC7 inhibition robustly increases SSTR and HR, and  
179 in this context can be used to increase the frequency of both single nucleotide substitutions and  
180 endogenous gene tagging.

181

### 182 **CDC7 inhibition enhances knock-in efficiency in primary T-cells**

183 HDR in primary cells is a long-standing goal of gene editing, both for its ability to correct disease-  
184 causing SNPs and to deliver large payloads such as chimeric antigen receptors<sup>21,25</sup>. We therefore  
185 investigated the ability of XL413 to increase HR in human T-cells derived from healthy donor peripheral  
186 blood mononuclear cells (PBMCs). We performed editing using an RNP targeting the *RAB11A* locus and  
187 a linear dsDNA donor to generate an N-terminal GFP fusion<sup>21</sup>. XL413 treatment after editing produced a  
188 dose-dependent increase in HR efficiency that approached two-fold over the untreated control **[Figure**  
189 **4F]**, without evidence of decreased viability **[Extended Data Figure 3]**. XL413's ability to potentiate  
190 Cas9-mediated HR may make it valuable for challenging gene editing workflows in T-cells and other  
191 primary cell types, for example when making CAR-Ts. We speculate that XL413 or alternative CDC7  
192 small molecule inhibitors could improve the overall fraction of successfully edited cells in these contexts.

193

### 194 **CDC7 inhibition causes cell cycle arrest**



195 We next examined the molecular mechanism by which the XL413 CDC7 inhibitor leads to  
196 increased HDR. CDC7 is the catalytically active subunit of DBF4-dependent kinase (DDK), which  
197 phosphorylates and activates the MCM helicase to initiate the G1/S transition<sup>26,27</sup>. We therefore expected  
198 XL413 to halt cells in G1/S instead of late S/G2 when HR is supposed to be most active. We found that  
199 XL413 treatment indeed rapidly and reversibly inhibited MCM2 phosphorylation **[Figure 5A]**, but that  
200 XL413 treatment caused accumulation of cells in S-G2-M phases of the cell cycle, as measured by a  
201 FUCCI live cell cycle reporter and propidium iodide staining<sup>28</sup> **[Extended Data Figure 4 and Figure**  
202 **5B]**. Arrest with XL413 is distinct in cell cycle from other cell cycle modulators that have been tested for  
203 increased HR such as Aphidicolin and Hydroxyurea <sup>7</sup> **[Figure 5C-D]**.

204

### 205 **Timing of CDC7 inhibition determines its efficacy**

206 Since CDC7 is an initiator of the G1/S transition, we reasoned that even a slight alteration of the  
207 timing of XL413 administration should dramatically alter cell cycle distribution. We previously arrested  
208 cells using a timing that would cause them to accumulate in G1/S *during* editing by “post” exposure to  
209 CDC7 inhibitor (e.g. edited cells recovered into XL413-containing medium) **[Figure 4]**. We therefore  
210 asked whether accumulating cells in G1/S and then *releasing* them during editing by “pre” exposure to  
211 XL413 would move them from an HR permissive to non-permissive section of the cell cycle.

212

213 Our usual post-exposure to XL413 after RNP and donor nucleofection supported increased levels  
214 of SSTR and HR **[Figure 6A]**. However, pre-exposure to XL413 and then release during editing resulted  
215 in reduced levels of HDR, suggesting that timing of cell cycle arrest and releasing the cells into HDR-  
216 permissive S-phase is crucial. The cell cycle arrest caused by XL413 presumably changes three major  
217 parameters in the cell: the activity of CDC7, the frequency of replication fork-DSB encounters, and the  
218 activation of cell-cycle regulated DNA repair pathways<sup>29</sup>. While Aphidicolin and Hydroxyurea also  
219 arrested cells at the G1/S transition, these arrests preserved a G1 DNA content **[Figure 5C-D]**, and did  
220 not support increased HR across multiple sites when used with the same drug-administration scheme as

221 XL413 (i.e. edit, recover into drug, then transfer to drug-free media) **[Figure 6B]**. Together with our pre-  
222 vs post- inhibition experiments, this suggests that early-to-mid S-phase is a critical window for Cas9-  
223 mediated SSTR and HR, rather than the assumed late S/G2.

224  
225 Finally, we asked how CDC7 inhibition by XL413 compared to other small molecule approaches that  
226 have been reported to boost HR and SSTR. The LIG4 inhibitor SCR7 reportedly increases HR by  
227 inhibiting NHEJ, and the RAD51 agonist RS-1 reportedly increases HR by boosting recombination  
228 itself<sup>30,31</sup>. We tested both SCR7 and RS-1 for their ability to increase HR and SSTR at two different  
229 endogenous loci but found no stimulation of either type of HDR. Combining SCR7 or RS-1 with XL413  
230 for 24 hours similarly did not increase HR beyond XL413 alone, and RS-1 treatment may actually reduce  
231 CDC7-inhibition effects on HR **[Figure 6C]**.

232

## 233 **Discussion**

234 In summary, we have defined a network of genes that contribute to Cas9-mediated HR using  
235 dsDonor DNA. A close comparison between the results from two pooled CRISPRi screens using different  
236 donor templates (ssDNA vs. plasmid dsDonor) revealed that many DNA repair factors are shared between  
237 SSTR and HR. The most striking commonality is the shared dependence on much of the FA pathway for  
238 both forms of repair. Despite this shared reliance on the FA pathway, we also observed genetic differences  
239 between the different types of HDR as well as more subtle differences in the requirement for certain  
240 components of the FA subcomplexes. Overall, this suggests that the fundamental HDR pathway is the  
241 same for templated repair of a Cas9 break with ssDonor or dsDonor, but the stability and incorporation of  
242 different donor templates requires different factors. Future work could dissect the roles of the different  
243 FA sub-complexes in SSTR and HR.

244

245 We mined our HR and SSTR screening datasets to identify factors that repress HDR and whose  
246 knockdown increases the efficiency of targeted genome modifications, such as the introduction of point

247 mutations or knock-in of fluorescent reporters. We used this genetic knowledge to develop effective  
248 protocols to enhance both SSTR and HR through small molecule inhibition of CDC7. XL413, a CDC7  
249 inhibitor, improves the efficiency of gene editing workflows for basic research or therapeutic applications,  
250 dramatically increasing gene replacement in challenging contexts, in multiple cell types, and in cell types  
251 with tremendous therapeutic potential, such as primary T-cells. This increase in gene replacement  
252 efficiency is caused by cell cycle arrest and is consistent with existing models that HR pathways are mainly  
253 active during S/G2/M phases<sup>29</sup>. However, our results suggest that the HDR-permissive window may be  
254 much narrower than previously supposed. In our hands, arrest of cells in G1/S with the DNA polymerase  
255 inhibitor Aphidicolin, or the ribonucleotide reductase inhibitor Hydroxyurea, does not increase HDR.  
256 Nocodazole arrest of cells at G2/M prior to nucleofection has been reported to increase HDR in cell lines.  
257 However, reduction of this stimulation when Nocodazole-arrested cells are released into an Aphidicolin  
258 block suggests that release from Nocodazole into a *subsequent* S-phase is the key parameter, and not the  
259 G2/M arrest itself<sup>7</sup>. Collectively, these data suggest that XL413 increases the percent of cells in early S  
260 phase, when Cyclin-dependent Kinases are active and DNA repair protein abundance is high, and that  
261 these parameters in turn support increased levels of HDR.

262  
263 Our identification of XL413 through systematic characterization of DNA repair pathways  
264 demonstrates the robustness of our approach. XL413 works best when administered after Cas9 editing,  
265 despite the fact that CDC7 inhibition was identified in a screen that was performed in the context of  
266 constitutive transcriptional inhibition (both pre- and post- editing) of DNA repair factors. These  
267 methodological differences between our screening platform and downstream small molecule inhibition  
268 may explain why small molecule inhibition of many screen hits was suboptimal. Stronger methodological  
269 ties between screen and validation may thus be the basis for future screening approaches using these  
270 reagents.

271

272 We speculate that additional combinatorial treatments could be used to boost HDR beyond what can be  
273 achieved with CDC7 inhibition alone. In our hands, the two previously described small molecules RS-1  
274 and SCR7<sup>30,31</sup> did not have an additive effect with XL413 to increase HR. However, we have not  
275 exhaustively tested XL413 in combination with other small molecules that increase HR, such as Beta  
276 adrenergic receptor agonists<sup>32</sup>. Nor have we tested co-administration of recombinant proteins, such as the  
277 53BP1 inhibitor reported to boost HDR outcomes in human cell lines<sup>33</sup>. Our unbiased screen also  
278 identified that knockdown of 53BP1 increases HDR, so dual inhibition of CDC7 and 53BP1 could further  
279 increase HDR. However, 53BP1 cooperates with p53 to suppress genomic instability<sup>34</sup>, and it is unclear  
280 what effect misregulating this protein to boost HDR may have on genome stability.

281  
282 The recent development of cell-cycle regulated Cas9 derivatives, including a Cas9-Geminin  
283 fusion, introduces the possibility of restricting Cas9 activity to HDR-permissive S/G2/M phases and is  
284 complementary to manipulation of the cell cycle<sup>35,36</sup>. While use of this Cas9 variant marginally increases  
285 absolute HDR efficiency, it decreased unwanted NHEJ since Cas9-Geminin is degraded in G1 phase when  
286 NHEJ is the main repair pathway. Combining cell-cycle regulation of Cas9 activity with accumulation of  
287 cells in the permissive phase of the cell cycle may thus comprise a potent strategy to boost HDR while  
288 minimizing undesirable editing outcomes. We anticipate that further work to map fundamental DNA  
289 repair pathways will suggest new strategies and targetable regulators to increase the precision and the  
290 efficacy of gene editing workflows.

291  
292 **Acknowledgments**

293 J.E.C is supported by a National Institutes of Health New Innovator Award (DP2 HL141006), the Li Ka  
294 Shing Foundation, and the Heritage Medical Research Institute. A.M. received a career award from the  
295 Burroughs Wellcome Fund, funding from Innovative Genomics Institute (IGI), and is a Chan Zuckerberg  
296 Biohub investigator. B.W. was funded by a Sir Keith Murdoch fellowship from the American Australian  
297 Association. C.D.R. was funded by the Fanconi Anemia Research Fund.

298

## 299 **Financial Conflict Statement**

300 A.M. and J.E.C. are cofounders of Spotlight Therapeutics. J.E.C. has received sponsored research support  
301 from AstraZeneca and Pfizer. A.M. serves as a scientific advisory board member to PACT Pharma, and  
302 was previously an advisor to Juno Therapeutics. The Marson laboratory has received sponsored research  
303 support from Juno Therapeutics, Epinomics, and Sanofi and a gift from Gilead. C.D.R. is an employee of  
304 Spotlight Therapeutics.

305

## 306 **Author Contributions**

307 B.W., J.E.C., and C.D.R. conceived the study. C.D.R. and B.W. designed experiments. S.J.F. and K.R.K.  
308 performed pooled CRISPRi screen. C.D.R. analyzed data from CRISPRi screen. M.L. generated K562  
309 FUCCI reporter cell line. D.N. performed T-cell experiments. B.W. and S.J.F. performed drug treatments  
310 and genome editing in all cell lines. B.W. performed cell cycle experiments with FUCCI cells. S.K.W.  
311 performed NGS data analysis. A.M. provided reagents. C.D.R. and J.E.C. supervised study. C.D.R., B.W.,  
312 S.J.F. and J.E.C. wrote the manuscript with input from all authors.

313

## 314 **Supplemental Documents**

315 Document S1 - All molecular biology reagents

316 Document S2 - Pooled screen results

317

318

## 319 Main Figures

Figure 1

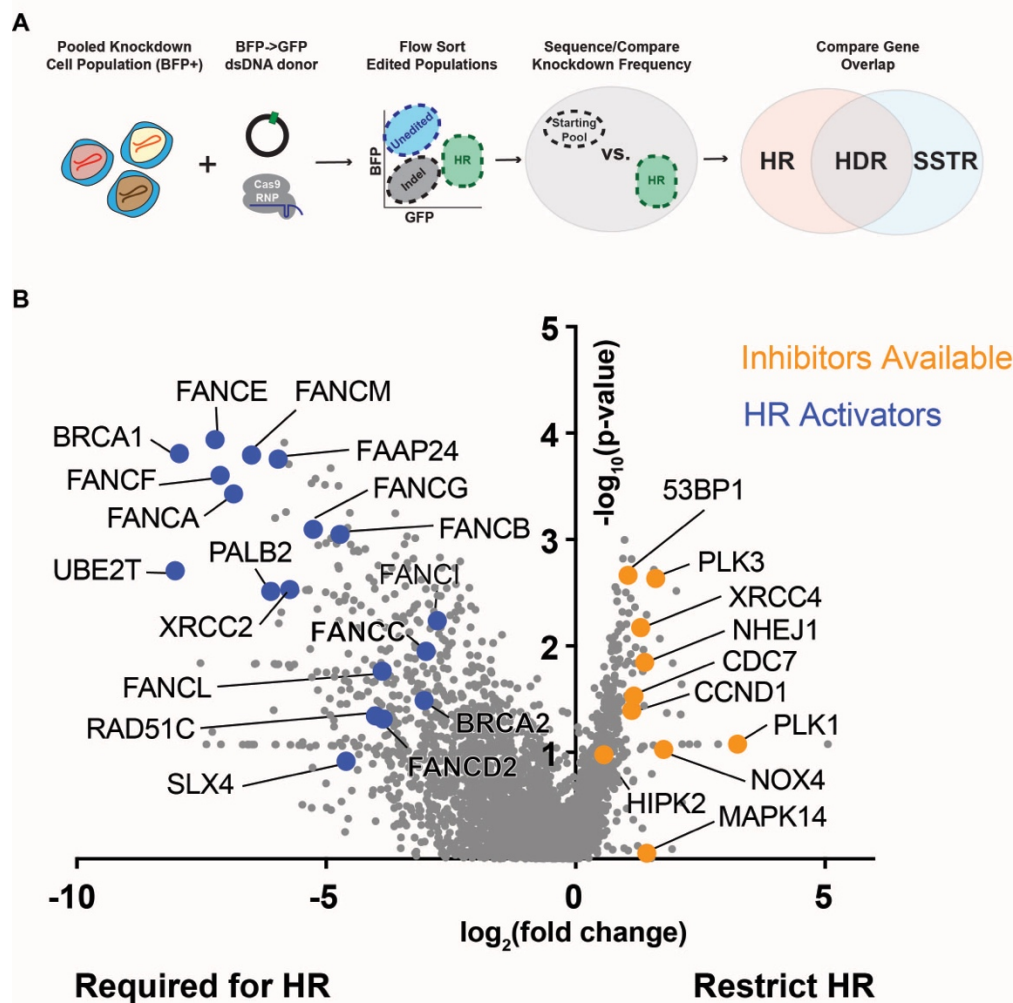

320  
 321 **Figure 1:** A pooled screen reveals pathways that regulate templated repair using Cas9-DSB and a double  
 322 stranded plasmid donor. **(A)** Schematic showing BFP→GFP CRISPRi screening strategy. Pooled K562  
 323 cells that stably express BFP and inhibit DNA metabolism genes are edited with Cas9 RNP that cuts within  
 324 BFP and a dsDNA plasmid donor that contains a promoterless copy of GFP. Cas9 gene editing results in  
 325 three populations: Unedited – BFP<sup>+</sup>, Indel – non fluorescent, and HR – GFP<sup>+</sup>. Guide RNA frequencies in  
 326 the HR population were quantified and compared to the unsorted population to identify genes that  
 327 promote/restrict HR. These genes were compared to data from a prior screen using ssDNA donor<sup>8</sup>. **(B)**  
 328 Genes repress and promote dsDonor HR. A volcano plot of pooled screen hits showing the Fanconi  
 329 Anemia pathway (blue) and HR repressors with available small molecule inhibitors (orange). Data  
 330 presented from n=2 screen replicates.

331

Figure 2

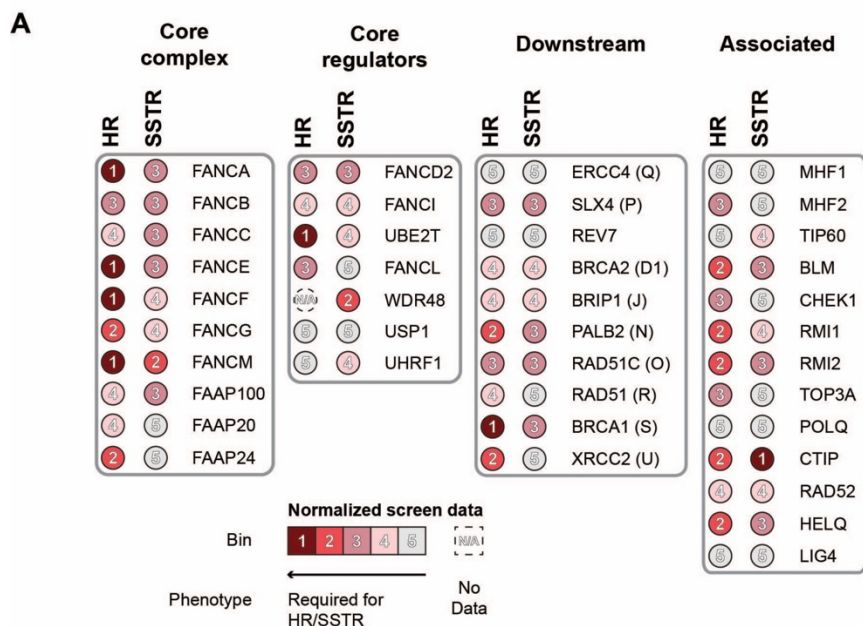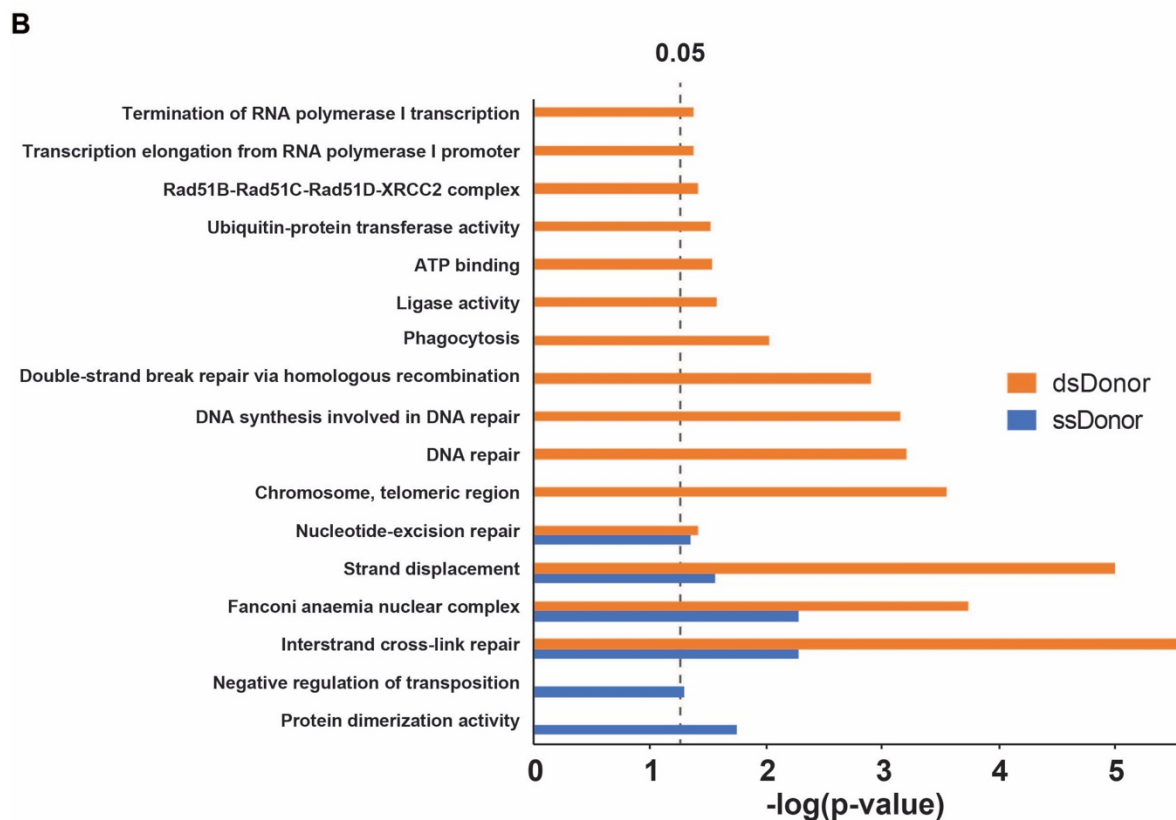

332

333 **Figure 2:** dsDonor HR requires the Fanconi Anemia pathway and is genetically distinct from SSTR. (A)

334 The FA repair pathway is required for HR and SSTR. Gene names are annotated with normalized

335 phenotype scores (see Online Methods) for both HR and SSTR screens. Increasing color intensity and

336 decreasing bin number is proportional to the effect size seen in the HR or SSTR screen data. Functional

337 FA complexes: the FA Core complex, Core regulators influencing FANCD2-FANCI ubiquitination,  
338 Downstream repair effectors, and Associated factors. Raw data presented in [**Document S2**]. (**B**) Unique  
339 and shared genetic pathways contribute to SSTR and HR. GO term analysis for statistically significant  
340 ( $p < 0.05$ ) hits from HR and SSTR screens. Data presented as GO terms enriched in HR dataset (plasmid,  
341 orange) or SSTR dataset (ssDNA, blue). Bar plot heights present statistical significance of GO term  
342 enrichment. Raw data presented in [**Document S2**] or prior publication<sup>8</sup>. Data represent two biological  
343 replicates each of the HR and SSTR screens.



### Figure 3

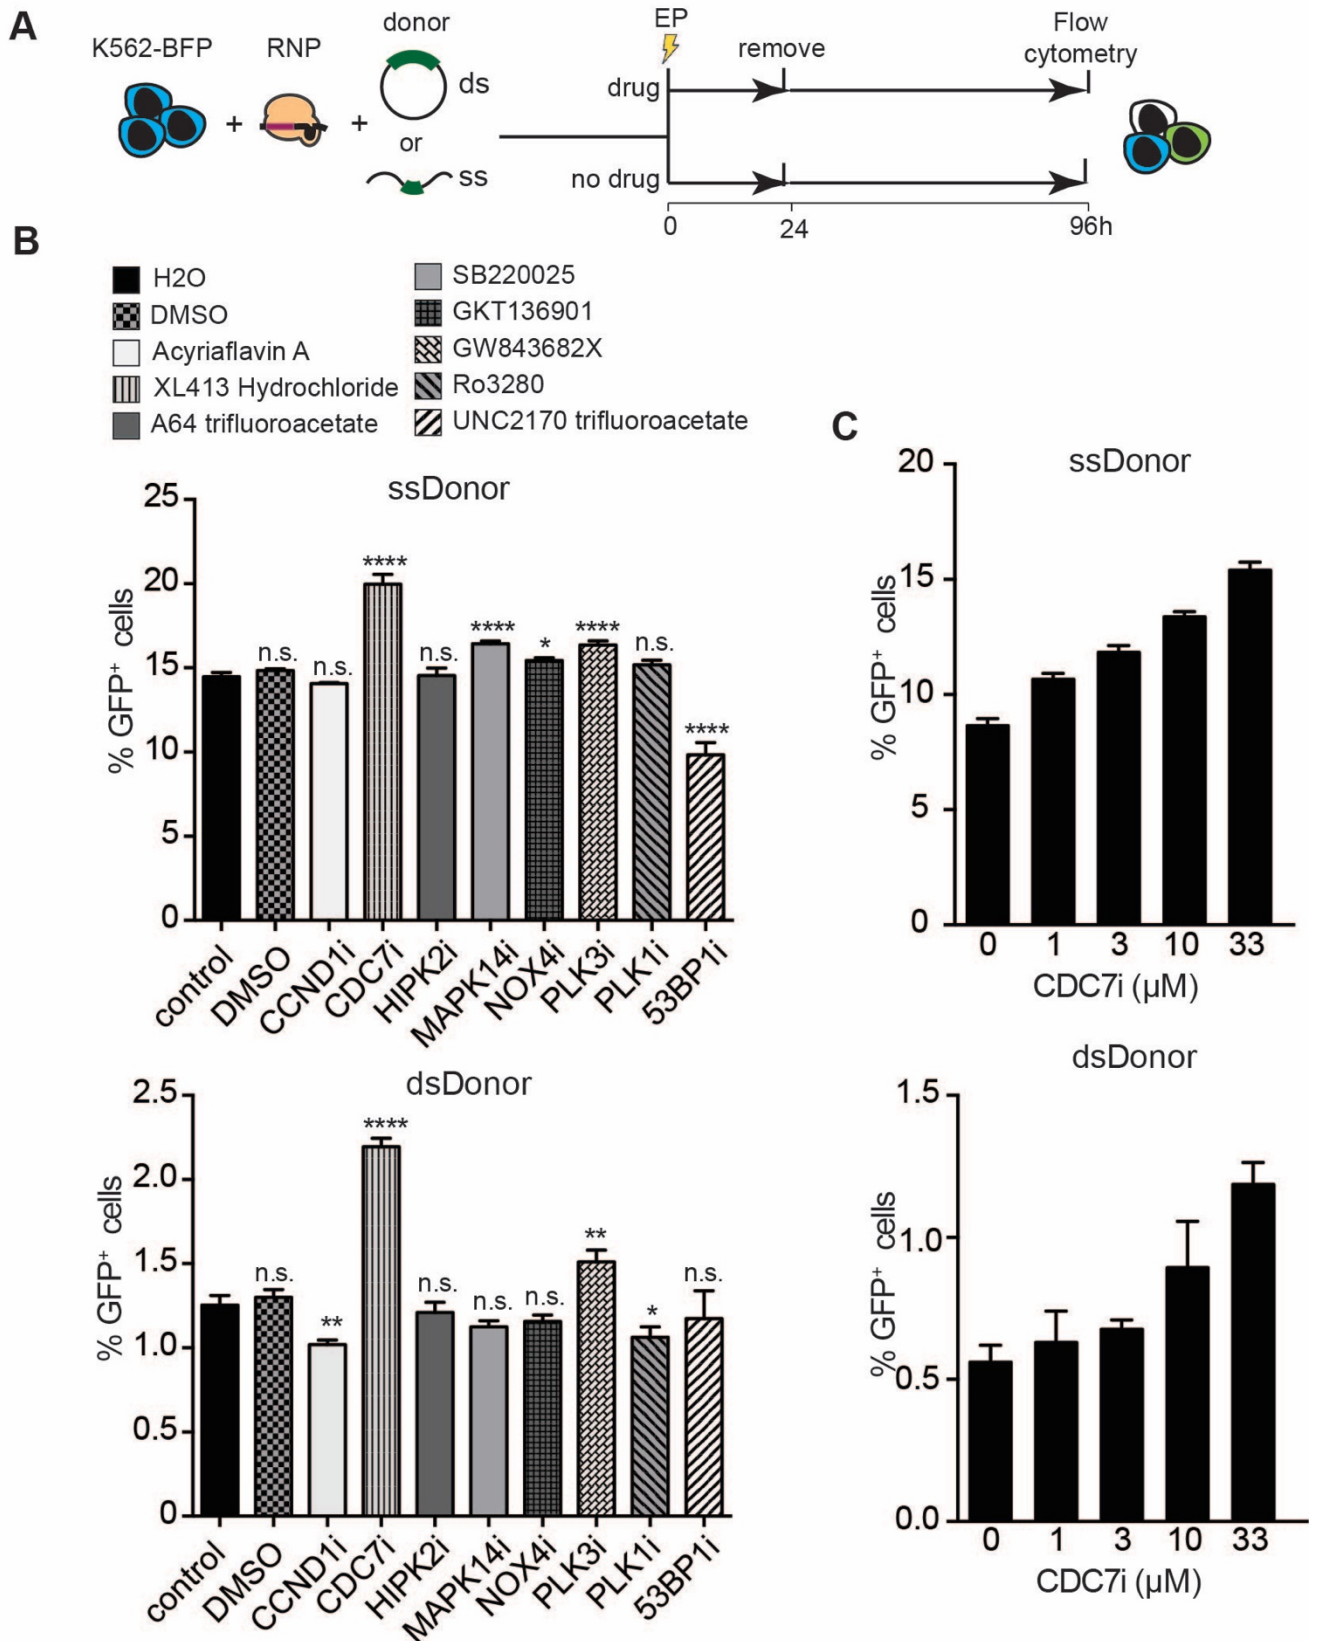

344

345 **Figure 3:** Enhancing HR by small molecule inhibition of factors discovered in genetic screening. (A)

346 Schematic of small molecule evaluation. K562-BFP cells were transfected with Cas9 RNPs targeting the

347 BFP transgene and either dsDNA plasmid or ssDNA donor. After electroporation (EP), cells were added  
348 to media with or without drug. Cell populations were recovered into fresh media after 24h and analyzed  
349 by flow cytometry after 96h. **(B)** CDC7 inhibition with XL413 significantly increases SSTR and HR by  
350 flow cytometric analysis of K562-BFP cell populations. Shown is the percentage of GFP positive cells 4  
351 days post nucleofection with ssDNA (top) or dsDNA plasmid donor (bottom) comparing different drug  
352 treatments. X-axis indicates the intended molecular target of small molecule inhibitors, with the compound  
353 identifier above. **(C)** XL413 increases HDR in a concentration-dependent manner. Shown is the  
354 percentage of GFP positive cells 4 days post nucleofection for editing with ssDonor (top) and dsDNA  
355 plasmid donor (bottom). All values are shown as mean±SD (n=3 biological replicates). Statistical  
356 significances were calculated by unpaired t-test between indicated sample and control (\*p<0.05,  
357 \*\*p<0.01, \*\*\*p<0.001, \*\*\*\*p<0.0001, n.s.: not significant).

**Figure 4**

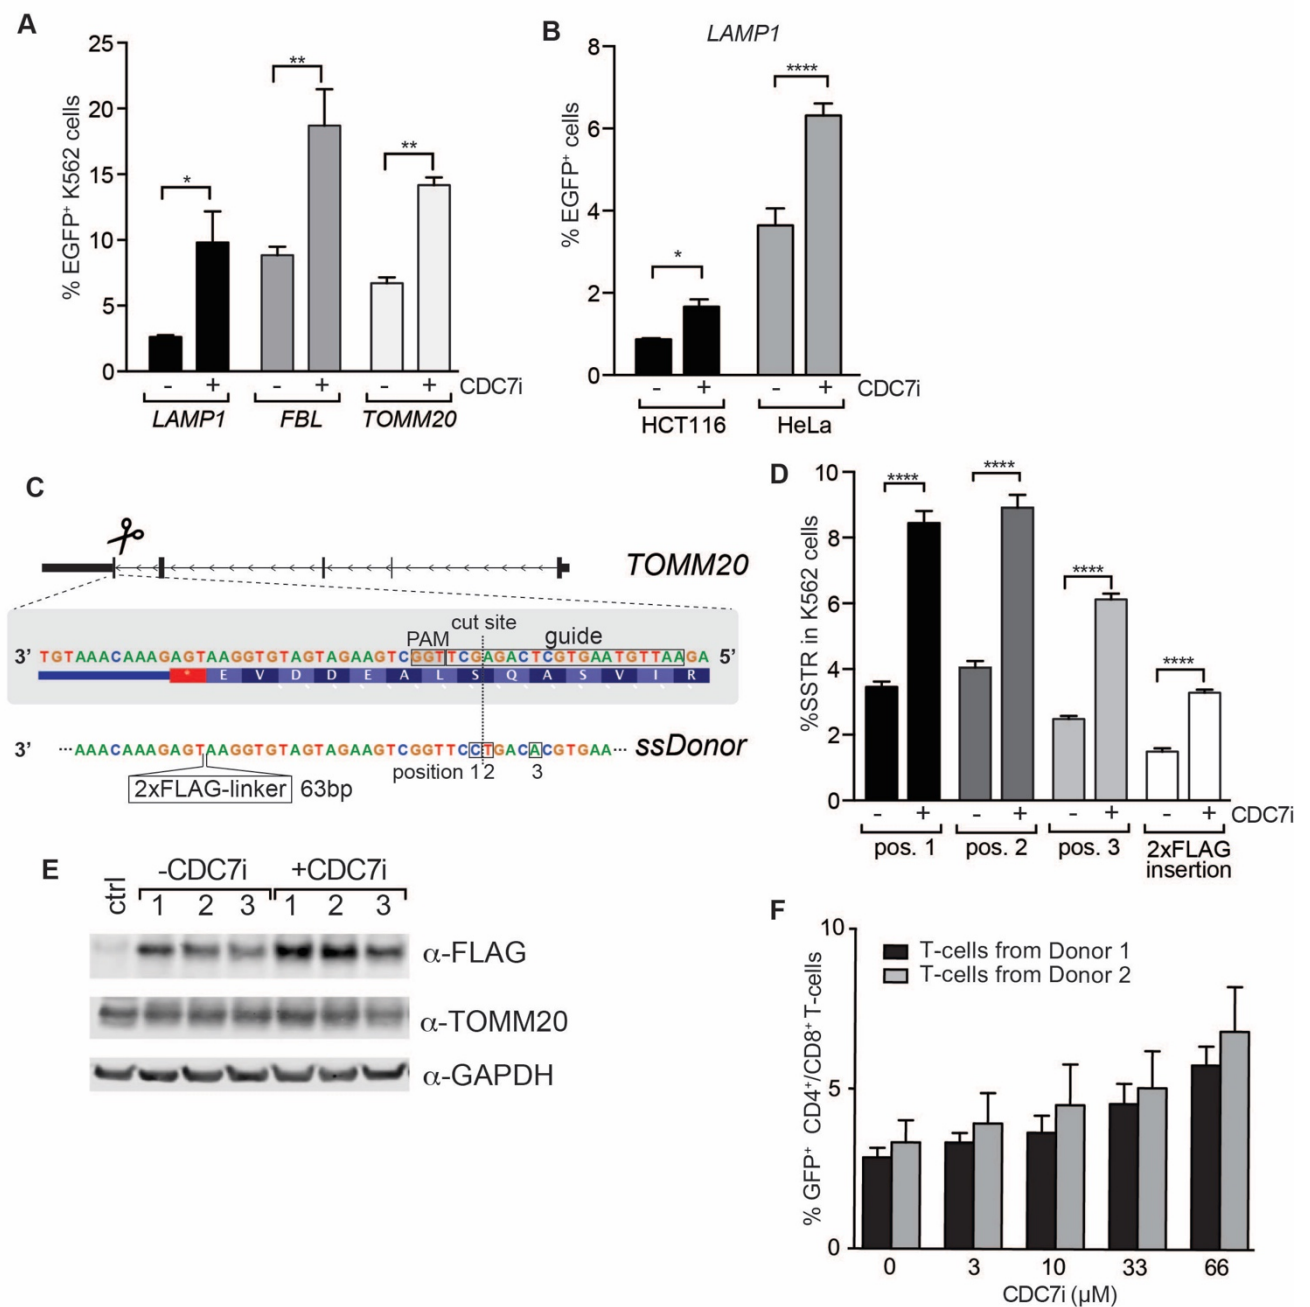

358  
 359 **Figure 4:** CDC7 inhibition increases HR and SSTR in diverse contexts. (A) XL413 increases HR at  
 360 endogenous loci with large HR donors. Cell were nucleofected with RNP targeting three different genomic  
 361 loci (*LAMP1*, *FBL* and *TOMM20*) and dsDNA plasmid donor DNA to knock-in an *eGFP* sequence to the  
 362 C-terminal end of the gene. Half of the pool of nucleofected cells was treated with 33 μM XL413 for 24h  
 363 while the other half remained untreated. Flow cytometric analysis determined the percentage of eGFP  
 364 positive K562 cells 4 days after nucleofection. (B) XL413 increases HR in multiple cell lines. Flow  
 365 cytometric analysis of HCT116 and HeLa cells edited at the *LAMP1* using the same editing strategy as

366 described in (A). (C) Schematic outlining the genome editing strategy to knock-in a 2xFLAG sequence at  
367 the C-terminus of using an ssDonor. A linker (GGGGS)-2xFLAG sequence (63 bp) and three additional  
368 silent point mutations are introduced near the Cas9 target site. (D) XL413 increases SSTR at endogenous  
369 loci. Cells were nucleofected with RNP targeting *TOMM20* and 2xFLAG ssDonor [Figure 4C] in the  
370 presence or absence of 33  $\mu$ M XL413 for 24h, gDNA was extracted after 4 days, and SSTR frequencies  
371 were determined by amplicon sequencing. (E) XL413 promotes on-target editing. Western Blot analysis  
372 for FLAG and TOMM20 expression in non-transfected K562 cells (ctrl) and nucleofected K562s cells  
373 with and without treatment with XL413. Cells were nucleofected with RNP targeting *TOMM20* and  
374 2xFLAG ssDonor in the presence or absence of 33  $\mu$ M XL413 for 24h. Cells were harvested for protein  
375 extraction 4 days post nucleofection. Data presented is representative of Western Blots on n=2  
376 experiments. (F) XL413 increases HR efficiency in primary human T-cells. CD3+ T-cells (mixture of  
377 CD4+ and CD8+) from two healthy donors were nucleofected with RNP targeting *RAB11A* and 0.25  $\mu$ g  
378 of a linear dsDNA donor that encodes an N-terminal fusion of GFP to the *RAB11A* gene. XL413 was  
379 added to growth media for 24h post-editing in indicated concentrations, and GFP expression was  
380 determined by flow cytometry after 3 days (n=3 per condition for each donor). Values in panels A-F are  
381 shown as mean $\pm$ SD (n=3 biological replicates). Statistical significances were calculated by unpaired t-test  
382 (\*p<0.05, \*\*p<0.01, \*\*\*p<0.001, \*\*\*\*p<0.0001, n.s.: not significant).

**Figure 5**

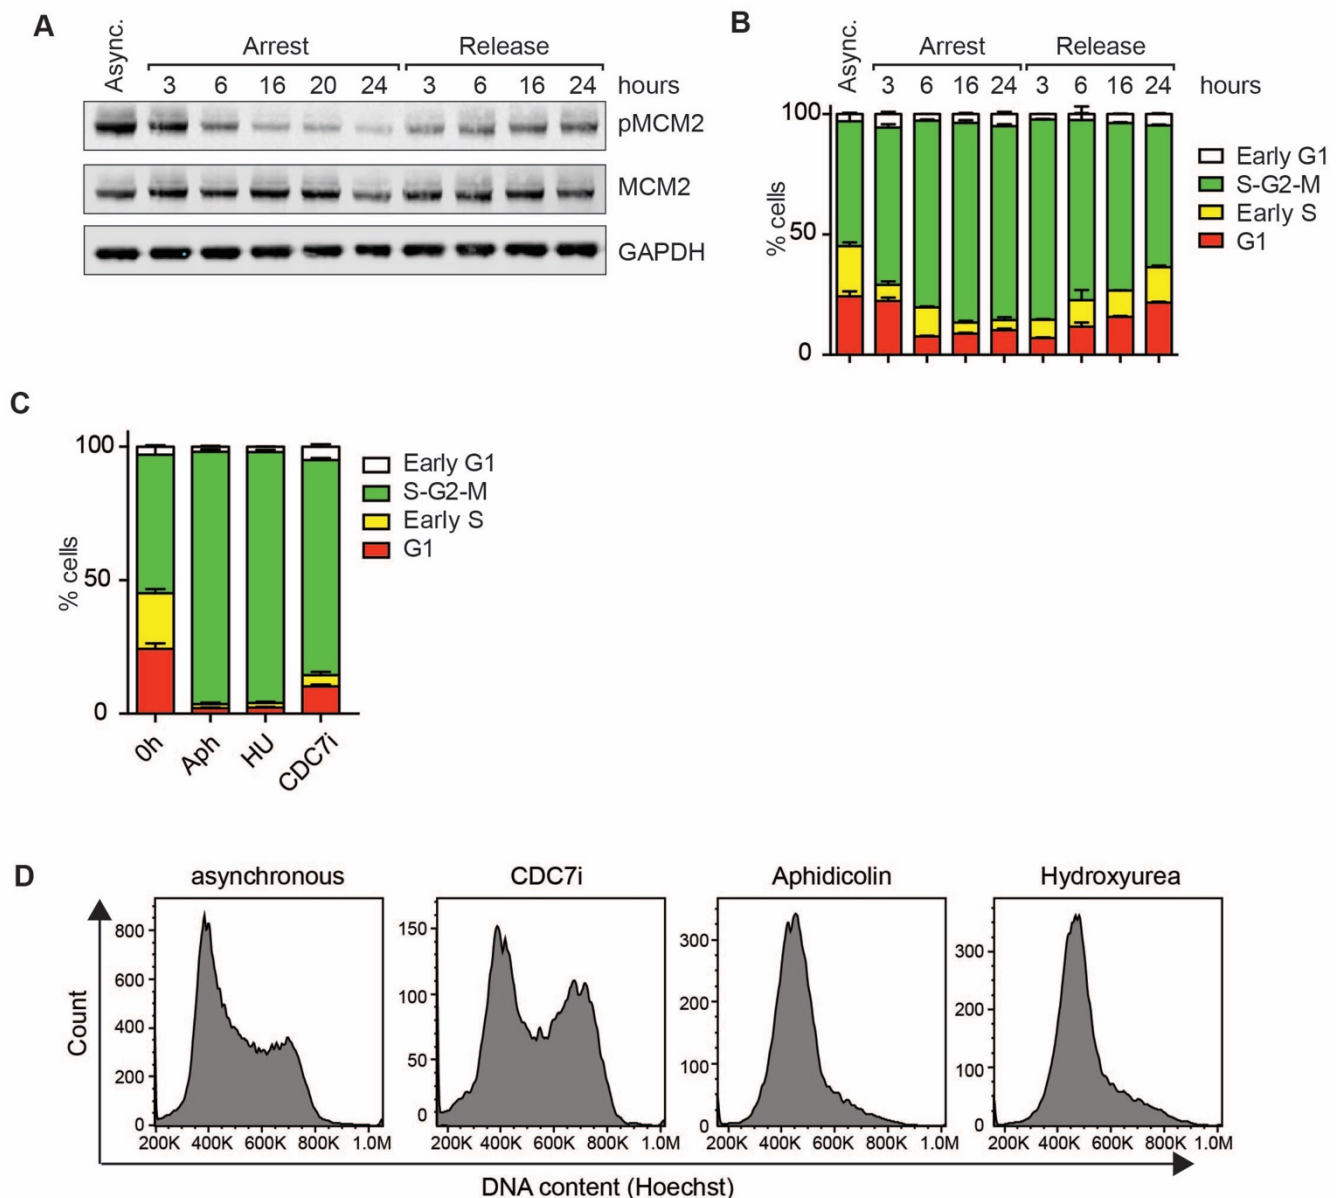

383

384 **Figure 5:** CDC7 inhibition promotes reversible cell cycle arrest. (A) CDC7 inhibition reduces phospho-

385 MCM2 by Western Blot. K562 cells were either left asynchronous or treated with XL413. Cells were

386 harvested for protein extraction at indicated time points during arrest-release experiments. (B) XL413

387 induces a reversible cell cycle arrest. Representative flow cytometry plots of asynchronous K562-FUCCI

388 cells and K562-FUCCI cells arrested with XL413 for the indicated time. (C) CDC7 inhibition concentrates

389 cells in S-G2-M. Cell cycle status in asynchronous K562 FUCCI<sup>28</sup> cells and K562 FUCCI cells treated

390 with XL413. Cells were treated as described in panel (A) and analyzed by flow cytometry. (D) CDC7

391 inhibition is distinct from arrests produced by Aphidicolin or Hydroxyurea, as measured by propidium

392 iodide staining for DNA content. Cells were arrested with XL413 (33  $\mu$ M), Aphidicolin (2  $\mu$ g/mL), or  
 393 Hydroxyurea (2 mM) for 24h. Cells were harvested 24h after arrest, stained with Hoechst 33342 to monitor  
 394 DNA content, and analyzed by flow cytometry. Data presented as in panel (C). Data in all panels are  
 395 representative of three independent experiments.

**Figure 6**

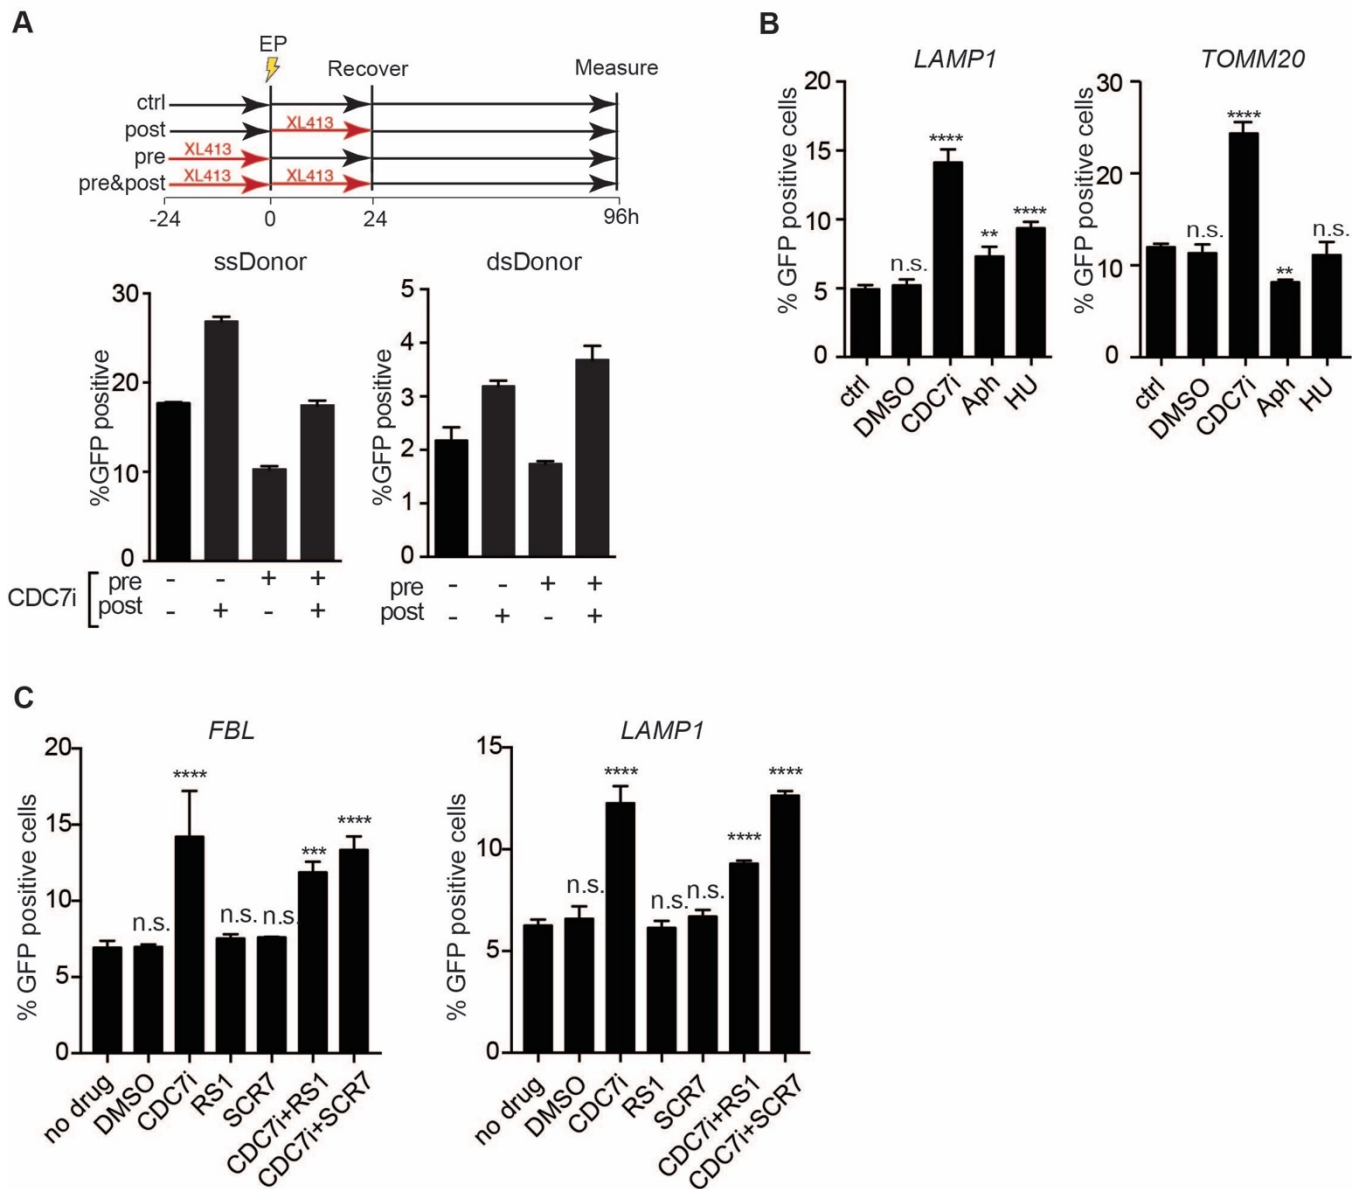

396  
 397 **Figure 6:** The timing of cell cycle arrest and release by CDC7 inhibition during editing is critical for  
 398 SSTR and HR. (A) Editing outcomes in K562-BFP cells after nucleofection with RNP and donor DNA  
 399 targeting the BFP transgene. Cells were untreated, treated for 24h with XL413 before nucleofection (pre),  
 400 treated for 24h with XL413 after nucleofection (post) or both (pre- and post). Percentage of eGFP positive

401 cells was determined 4 days post nucleofection using flow cytometry. **(B)** CDC7-induced arrest is more  
402 effective at boosting HR than other cell cycle arrests. K562 cells were nucleofected with RNP and eGFP  
403 donor plasmids targeting the C-terminus of either *LAMP1* (left panel) or *TOMM20* (right panel). Small  
404 molecules were added to the media of nucleofected cells for 24h. eGFP expression was monitored by flow  
405 cytometry 4 days post-nucleofection. **(C)** CDC7 arrest does not synergize with other HR boosting  
406 treatments. Effect of XL413 (33  $\mu$ M), SCR7 (1  $\mu$ M) and RS-1 (10  $\mu$ M) treatment on editing outcomes in  
407 K562 cells. Cells were nucleofected with RNPs and eGFP plasmid donor DNA targeting *FBL* and *LAMP1*  
408 loci and small molecules were added to the media of nucleofected cells for 24h. Cells were analyzed by  
409 flow cytometry 4 days post nucleofection. All values are shown as mean $\pm$ SD (n=3 biological replicates).  
410 Statistical significances were calculated by unpaired t-test (\*p<0.05, \*\*p<0.01, \*\*\*p<0.001,  
411 \*\*\*\*p<0.0001, n.s.: not significant).

412

413

## 414 Extended Data Figures

### Extended Data Figure 1

**A**

| Drug                     | Target  | Gene Function                                                                |
|--------------------------|---------|------------------------------------------------------------------------------|
| Acryiaflavin A           | CCND1   | Regulatory subunit of CDK4 or CDK6, required for cell cycle G1/S transition. |
| XL413                    | CDC7    | Kinase. Critical for the G1/S transition.                                    |
| A64 trifluoroacetate     | HIPK2   | Conserved serine/threonine kinase.                                           |
| SB220025                 | MAPK14  | Kinase. Functions in cell cycle regulation.                                  |
| GKT136901                | NOX4    | Catalytic subunit the NADPH oxidase complex.                                 |
| GW843682X                | PLK3    | Kinase. Regulator of cell cycle progression.                                 |
| Ro3280                   | PLK1    | Kinase. Early trigger for G2/M transition.                                   |
| UNC2170 trifluoroacetate | TP53BP1 | DSB protein. Promotes NHEJ, and limits homologous recombination.             |

**B**

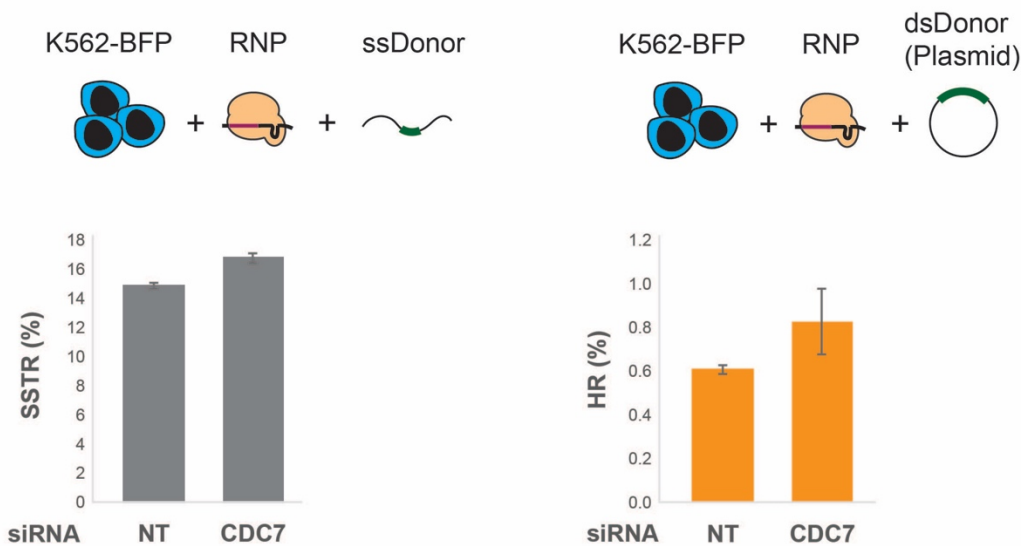

**C**

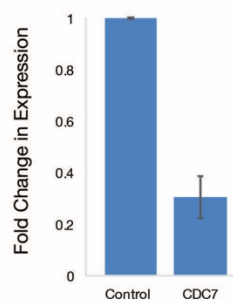

415  
 416 **Extended Data Figure 1:** siRNA inhibition of factors that restrict SSTR, HR, or both can promote  
 417 templated repair events. **(A)** Factors restricting SSTR and HR can themselves be inhibited by small  
 418 molecules. HDR repressors identified from our screen **[Figure 1]** that can be targeted with known small  
 419 molecule inhibitors. **(B)** siRNA inhibition of CDC7 influences SSTR and HR. Cells treated with siRNA  
 420 against mock sequence (NT) or CDC7 were edited with the indicated RNP and donor DNA and %GFP  
 421 was plotted for each population as analyzed by flow cytometry. Data presented as mean±SD (n=2). **(C)**



422 Fold depletion of the target transcript over controls (ACTB, GAPDH) was measured by qPCR. Data  
423 presented were calculated from n=4 cell pellets harvested at the time of electroporation.

### Extended Data Figure 2

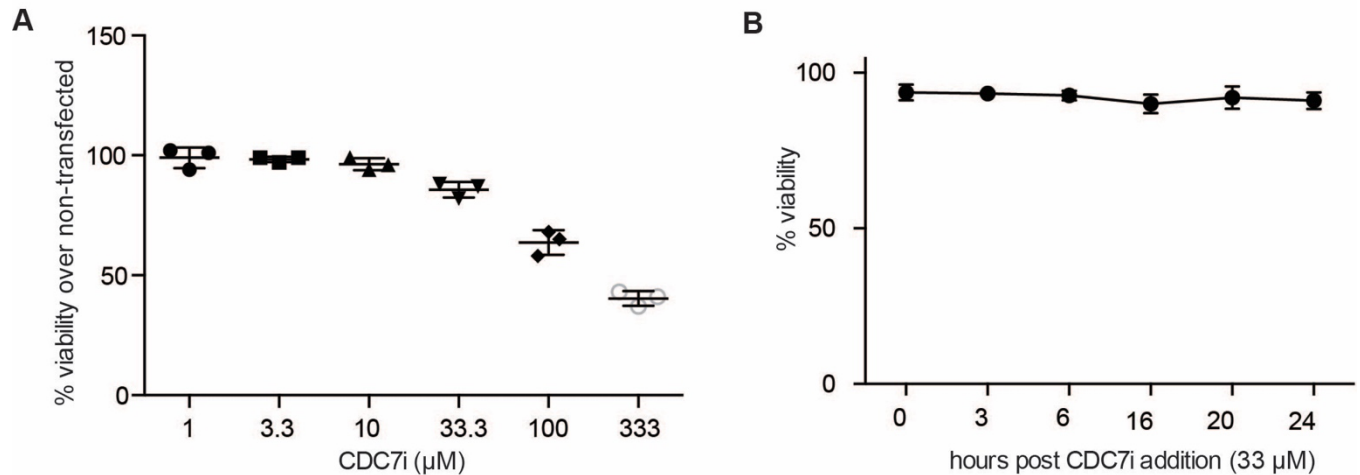

424  
425 **Extended Data Figure 2:** Effect of XL413 inhibitor on viability of K562 cells. (A) Increasing doses of  
426 XL413 are toxic. Viability of K562-BFP cells after nucleofection and treatment with XL413 at indicated  
427 concentrations for 24h. Viability was determined after 4 days by flow cytometry using forward and side  
428 scatter gates and viability was normalized to non-transfected K562 cells. (B) Working dose of XL413 is  
429 well tolerated. Viability of K562 cells at different time points post XL413 addition (33 μM). Viability was  
430 determined using Trypan blue exclusion test.

### Extended Data Figure 3

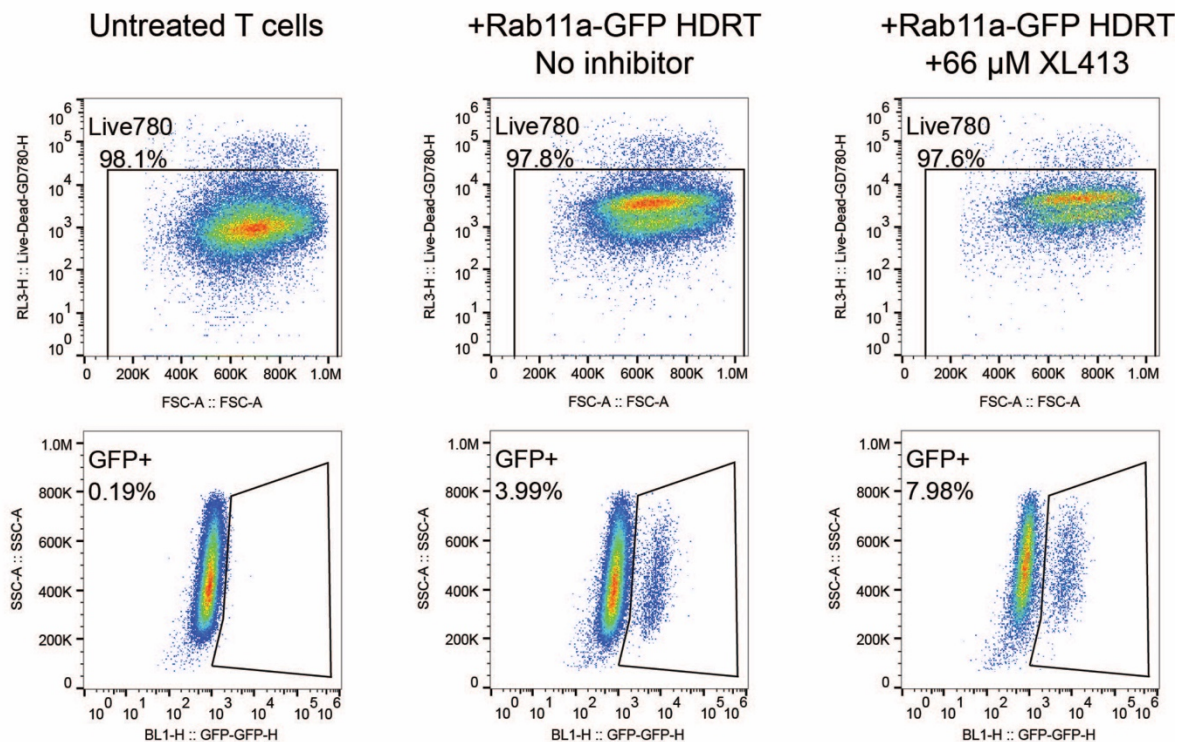

431

432 **Extended Data Figure 3:** Effect of XL413 inhibitor on growth of primary human T cells. CD3<sup>+</sup> T-cells  
433 (mixture of CD4<sup>+</sup> and CD8<sup>+</sup>) from two healthy donors were nucleofected with RNPs targeting *RAB11A*  
434 and 0.25 μg of a linear dsDonor template DNA that encodes an N-terminal fusion of GFP to the *RAB11A*  
435 gene. XL413 was added to a growth media for 24h post-editing in indicated concentrations (n=3 per  
436 condition for each donor). Viability was determined by staining with GhostDye780, and cell count was  
437 determined by sampling equal volumes per well on an Attune NxT flow cytometer. Panels from  
438 representative samples showing flow cytometry plots depicting viability (top) and GFP positivity (bottom)  
439 from electroporated CD3<sup>+</sup> T cells at day 3 that are either not treated with XL413, nucleofected with RNP  
440 and RAB11A-GFP donor but not treated with XL413, or nucleofected with RNP and RAB11A-GFP donor  
441 and treated with 66 μM XL413.

### Extended Data Figure 4

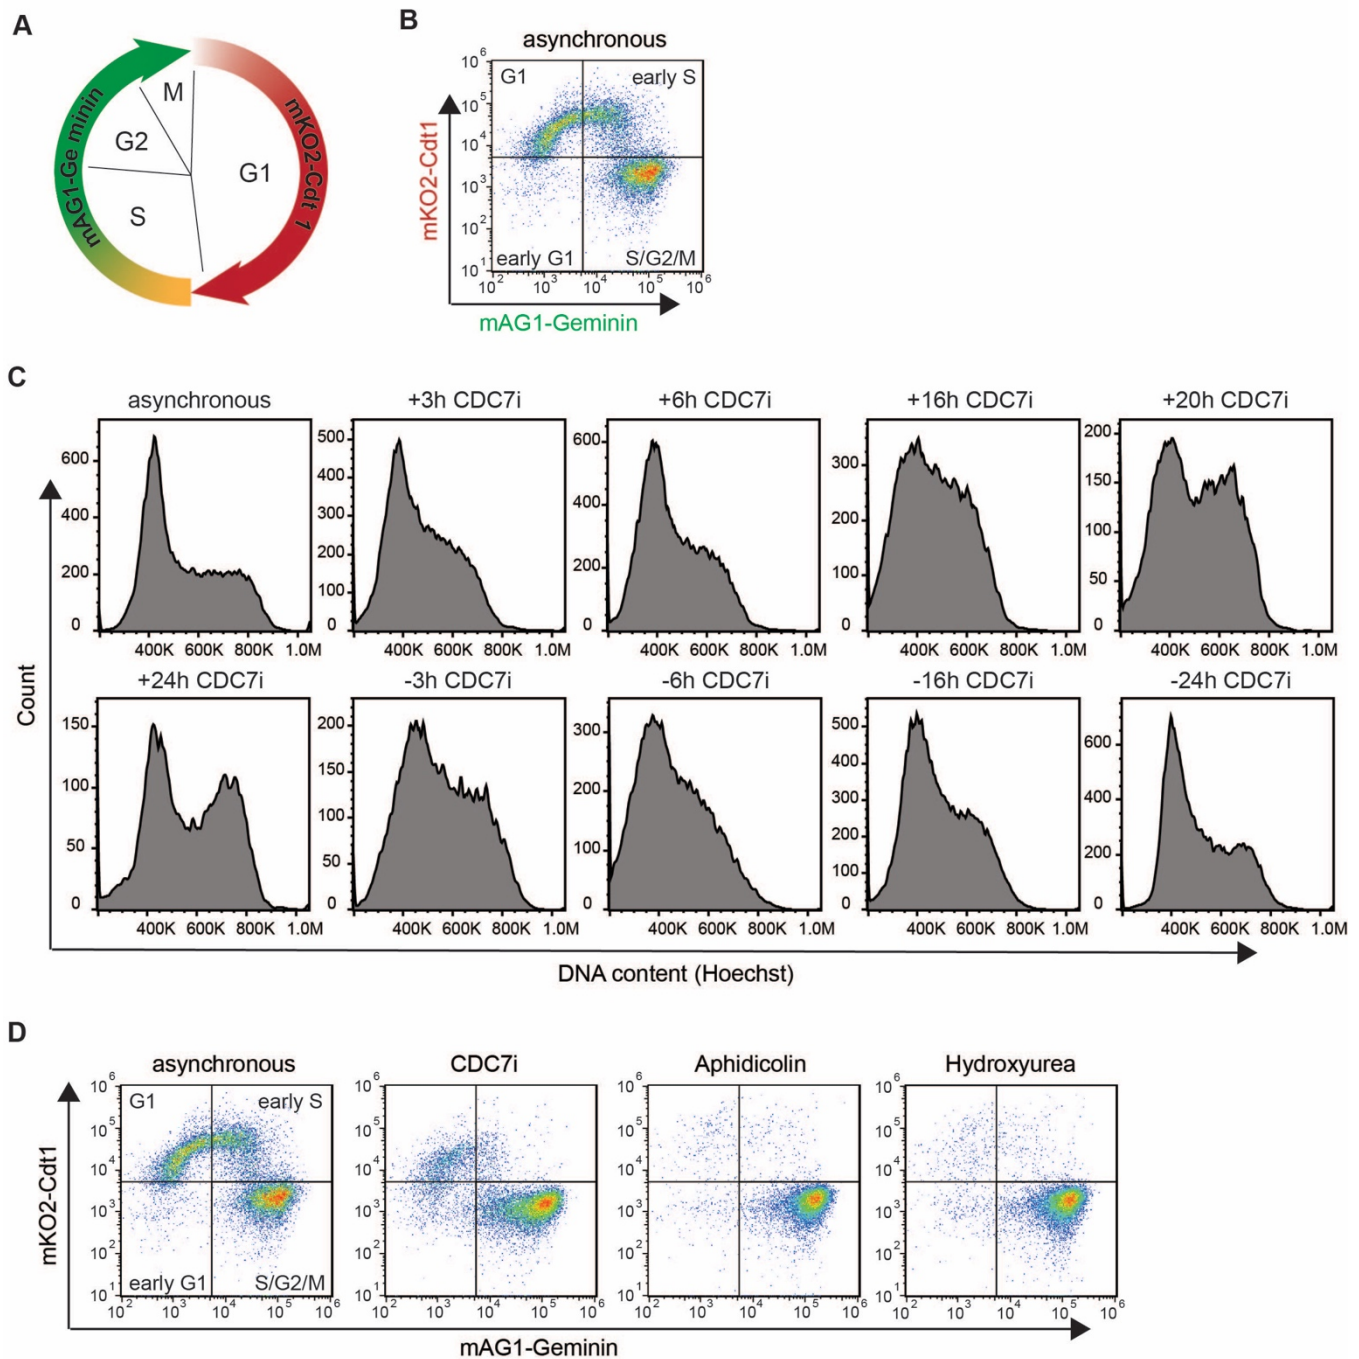

442  
443 **Extended Data Figure 4: CDC7 inhibition promotes reversible cell cycle arrest.** (A) Schematic showing  
444 the cell cycle dynamics of the FUCCI system. (B) Flow cytometric analysis of asynchronous K562-FUCCI  
445 cells. (C) CDC7 arrest reversibly alters DNA content of cell line cultures. DNA content of K562-FUCCI  
446 cells that were treated with XL413 (33  $\mu$ M) for 24h and then released into media without XL413. Cells  
447 were stained with Hoechst33342 before being subjected to flow cytometry at the indicated timepoints. (D)  
448 Flow cytometric analysis of arrested K562-FUCCI cells.

## 449 **Online Methods**

### 450 Cell Lines and Culture

451 HEK293T, HCT116, HeLa and K562 cells were acquired from the UC Berkeley Tissue Culture Facility.  
452 HEK293T, HCT116 and HeLa cells were maintained in DMEM medium supplemented with 10% fetal  
453 bovine serum and Penicillin/Streptomycin. K562 cells were maintained in RPMI medium supplemented  
454 with 10% fetal bovine serum and Penicillin/Streptomycin. Cell lines were tested regularly for mycoplasma  
455 contamination using enzymatic (Lonza, Basel, Switzerland) and PCR-based assays (Bulldog Bio,  
456 Portsmouth, New Hampshire).

457

### 458 Cas9, RNA, and Donor DNA Preparation

459 Streptococcus pyogenes Cas9 (pMJ915, Addgene #69090) with two nuclear localization signal peptides  
460 and an HA tag at the C-terminus was expressed in Rosetta2 DE3 (UC Berkeley Marcolab) cells. Cell  
461 pellets were sonicated, clarified, Ni<sup>2+</sup>-affinity purified (HisTraps, GE life sciences), TEV cleaved, cation-  
462 exchanged (HiTrap SP HP, GE life sciences), size excluded (Sephacryl S-200, GE life sciences) and eluted  
463 at 40 mM in 20 mM HEPES KOH pH 7.5, 5% glycerol, 150 mM KCl, 1 mM dithiothreitol (DTT)<sup>37</sup>.

464

465 sgRNAs were synthesized by Synthego as modified gRNAs with 2'-O-methyl analogs and 3'  
466 phosphorothioate internucleotide linkages at the first three 5' and 3' terminal RNA residues using  
467 protospacer sequences described in **[Document S1]**.

468

469 crRNAs/TracrRNAs were chemically synthesized (Edit-R, Dharmacon Horizon) using protospacer  
470 sequences described in **[Document S1]**.

471

472 ssDonor was obtained by ordering unmodified Ultramer oligonucleotides (Integrated DNA Technologies).

473

474 dsDonor was obtained by purifying plasmid DNA from bacterial cultures containing the indicated plasmid  
475 (Qiagen) or by SPRI purification of long double-stranded PCR amplicon.

476

#### 477 Plasmid Constructs

478 Sequences for plasmids used in this study are described in [**Document S1**]. Plasmids and maps will be  
479 available on Addgene after publication.

480

#### 481 Cas9 RNP Assembly and Nucleofection

482 30 pmoles of sgRNA was diluted using Cas9 buffer (20 nM HEPES [pH 7.5]), 150 mM KCl, 1mM MgCl<sub>2</sub>,  
483 10% glycerol, and 1 mM TCEP). 0.75 µl of 40 µM Cas9-2xNLS (30 pmoles) was slowly mixed in, and  
484 the resulting mixture was incubated for five minutes at room temperature to allow for RNP formation.  
485 After incubation, either 0.3 µl of 100 µM ssDonor or 2 µg of plasmid DNA was introduced and mixed  
486 by pipetting. The total volume of RNP solution was 5 µl, where the volume of Cas9 buffer was adjusted  
487 to account for volume differences between ssDonor and plasmid DNA. Between 1e+05 and 2e+05 cells  
488 were harvested, washed once in PBS, and resuspended in 15ul of nucleofection buffer (Lonza, Basel,  
489 Switzerland). 5ul of RNP mixture was added to 15ul of cell suspensions. Reaction mixtures were  
490 electroporated in Lonza 4D nucleocuvettes, incubated in the nucleocuvette at room temperature for five  
491 minutes, and transferred to culture dishes containing pre-warmed media. Large-scale nucleofections were  
492 performed by splitting cultures and conducting multiple parallel nucleofections.

493

494 Editing outcomes were measured four days post-nucleofection by flow cytometry or by amplicon  
495 sequencing (see below). Resuspension buffer and electroporation conditions were the following from each  
496 cell line: K562 in Buffer SF with FF-120, HEK293T in Buffer SF with DS-150, T cells in buffer P3 with  
497 EH-115, HCT116s in Buffer SE with EN-113, and HeLa cells in Buffer SE with CN-114.

498

#### 499 Genomic DNA Extraction (for Amplicon Sequencing)

500 Approximately  $1 \times 10^5$  cells were harvested and resuspended in 50 $\mu$ L of QuickExtract DNA extract  
501 solution (Lucigen). Reactions were incubated for 20 minutes at 65°C and 5 minutes at 95°C. Extractions  
502 were diluted 1:4 with dH<sub>2</sub>O, spun for 5 minutes at max speed in a microcentrifuge, and the supernatants  
503 retained for downstream analysis.

504

#### 505 PCR Amplification of Edited Regions

506 PCR reactions were generated from 2x Q5 master mix (NEB), primers **[Document S1]** at 500nM, and  
507 5 $\mu$ L of genomic DNA (see above). Unless otherwise noted, PCR primers have a 5' sequence tag  
508 (GCTCTTCCGATCT) that allows re-amplification for Illumina sequencing (amplify-on PCR). The  
509 thermocycler was set for one cycle of 98°C for 1 min, 35 cycles of 98°C for 10 sec, 63°C for 15 sec, 72°C  
510 for 60 sec, and one cycle of 72°C for 4 min, and held at 4°C. PCR amplicons were purified using SPRI  
511 beads, run on a 1.5% agarose gel to verify size and purity, and quantified by Qubit (Thermo Fisher,  
512 Waltham, MA).

513

#### 514 NGS Library Generation and Sequencing

515 Illumina adaptors and index sequences were added to 100ng of purified PCR amplicons by amplify-on  
516 PCR. Amplify-on was performed using 100ng of template DNA, 0.5  $\mu$ M of forward/reverse primers, and  
517 2x Q5 Master Mix (NEB). The thermocycler was set for one cycle of 98°C for 30 seconds, 16 cycles of  
518 98°C for 10 sec, 62°C for 20 sec, 72°C for 30 sec, and one cycle of 72°C for 1 min, and held at 4°C. Each  
519 adaptor-conjugated amplicon was quantified by qubit, normalized, and pooled at equimolar amounts.  
520 Pooled samples were purified using SPRI beads. Library size and purity was verified by Bioanalyzer trace  
521 prior to sequencing on an Illumina MiSeq using reagent kit v3 (2x300bp).

522

#### 523 NGS Analysis of Amplicons

524 Samples were deep sequenced on an Illumina MiSeq at 300bp paired-end reads to a depth of at least  
525 10,000 reads per sample. A customized version of CRISPResso<sup>38</sup> was used to analyze editing outcomes.

526 Briefly, reads were adapter trimmed then joined before performing a global alignment between reads and  
527 the reference and donor sequences using NEEDLE<sup>39</sup>. Rates of HDR are calculated as total number of  
528 reads that are successfully converted to the donor sequence (and have no insertions or deletions at the  
529 cutsite) divided by the total number of aligned reads. NHEJ rates are calculated as any reads where an  
530 insertion or deletion overlaps the cutsite or occurs within a six basepair window around the cutsite divided  
531 by the total number of aligned reads. SSTR/HDR rates were calculated at specific regions by counting  
532 total number of reads with flag occurrence divided by the number of aligned reads.

533

#### 534 Pooled Screen

535 Replicate cultures of K562 cells stably expressing a dCas9-KRAB construct and a cassette containing a  
536 BFP reporter and a guide RNA targeting a library of DNA repair factors (previously described<sup>8</sup>) were  
537 thawed, cultured, and puromycin treated. 10e+06 cells from each replicate were subcultured (UNZAP).  
538 25e+06 cells from each replicate were harvested for nucleofection. Each nucleofection aliquot was spun  
539 down, washed in PBS, and resuspended in 825 µl of nucleofection buffer SF (Lonza, Basel, Switzerland).  
540 275 µl of RNP editing mixture was added and mixed by pipetting. RNP for each replicate contained 2000  
541 pmoles of sgRNA, 1,650 pmoles of Cas9, and 220 µg of plasmid pCR1075 donor DNA in Cas9 buffer  
542 (20 nM HEPES [pH 7.5]), 150 mM KCl, 1mM MgCl<sub>2</sub>, 10% glycerol, and 1 mM TCEP). Each replicate  
543 of the RNP cell slurry was split and nucleofected in parallel in a Lonza 96-well Shuttle nucleofector (code  
544 FF-120), re-pooled, and cultured for two (replicate 1) or three (replicate 2) days. Nucleofected replicates  
545 were sorted into GFP+ (GFP) and non-fluorescent (NON) populations on a Sony SH800S sorter. In  
546 parallel, an 85e+06 cell aliquot was harvested from each non-electroporated population the day of the sort  
547 (UNZAP), and an 85e+06 cell aliquot was harvested from each nucleofected cell library on the day of  
548 sorting (PRESORT). Harvested and sorted populations were spun down, rinsed in PBS, and frozen at -  
549 80°C.

550

551 DNA from each cell population: PREZAP, UNZAP, PRESORT, GFP, and NON (non-treated) was  
552 purified using Machery-Nagel Blood Purification kits and the total amount of DNA quantified. One  
553 microgram of genomic DNA was amplified per Phusion HiFi PCR reaction using primers specific to the  
554 gRNA cassette as described <sup>40</sup>. Up to 24 PCR reactions were set up for each cell population to obtain  
555 desired coverage of the cell library. The thermocycler was set for one cycle of 98°C for 30 sec, 25 cycles  
556 of 98°C for 15 sec, 56°C for 15 sec, and 72°C for 15 sec, and one cycle of 72°C for 10 min and held at  
557 4°C. PCR reactions were pooled, purified using SPRI beads, and sized on an agarose gel. Amplified DNA  
558 from each cell population was normalized to input cell numbers, purified a second time using SPRI beads,  
559 and sequenced on a HiSeq2500 (Illumina).

560

#### 561 Pooled Screen Analysis

562 Data analysis was performed as described <sup>10</sup>. Briefly, sequence reads were trimmed, aligned to DNA  
563 Repair Guide Sequences [**Document S1 GUIDES**] and quantified. Read counts for each gRNA were  
564 normalized and compared to the distribution of untargeted control guides to determine significance and  
565 log<sub>2</sub> magnitude of change. The top three guide-level phenotypes were collapsed to produce gene-level  
566 phenotype score. Results for the GFPvPRE comparison are available in [**Document S2**].

567

#### 568 Pooled Screen Phenotype Comparison

569 The magnitude of gene-level phenotype scores (calculated above) varied between screens. To facilitate  
570 direct comparison of essential genes between HR and SSTR results, essential genes (phenotype scores <  
571 0) were unity normalized against all essential gene phenotype scores for the originating screen, such that  
572  $Z = (\text{phenotype\_score} - \min(\text{dataset})) / (\max(\text{dataset}) - \min(\text{dataset}))$ . The resulting normalized values ranged  
573 from 0 (strongest phenotype score) to 1 (weakest phenotype score). Z values were binned for display  
574 purposes: bin 1, 0.0-0.2; bin 2, 0.2-0.4; bin 3, 0.4-0.6; bin 4, 0.6-0.8; and bin 5, 0.8-1.0. FA and related  
575 genes from either screen (FAAP20, UHRF1, TIP60, POLQ, and LIG4) with a phenotype score > 0 were  
576 assigned to bin 5. Raw data from this figure is presented in [**Document S2**].



577

578 Pooled Screen GO-term Comparison

579 Data from SSTR<sup>8</sup> and HR (this manuscript) screens was filtered for statistical significance ( $p > 0.05$ ) and  
580 separated into two categories: genes involved in SSTR or genes involved in HR. The gene list for each  
581 category was compared to the starting guide pool [**Document S1 GUIDES**] using DAVID v6.8<sup>13</sup>. Default  
582 search categories were used.

583

584 siRNA Transfection

585 Approximately  $1e+05$  suspension or adherent cells were reverse transfected into 24-well plates using  
586 RNAiMAX (Thermo Fisher). siRNA [**Document S1**] dosage was 40 nM unless otherwise indicated. Cells  
587 were siRNA treated for 48 hours, harvested, nucleofected, and recovered into media lacking siRNA.  
588 Verification of knockdown was performed at the time of nucleofection via qPCR. Cells were harvested  
589 for flow cytometry or amplicon sequencing 4 days post nucleofection.

590

591 Drug Treatment

592 Acyriaflavin A, XL413, Aphidicolin, GW843682X and Ro3280 were sourced from Tocris. Hydroxyurea,  
593 A64 trifluoroacetate, GKT136901, SB220025 and UNC2170 trifluoroacetate were sourced from Sigma.

594

595 Approximately  $1e+05$  suspension or adherent cells were seeded post-nucleofection into 96-well plates in  
596 drugged media with the following concentrations: Acyriaflavin A at 5  $\mu\text{M}$ , XL413 at 33  $\mu\text{M}$ , Hydroxyurea  
597 at 2 mM, SRC7 at 1  $\mu\text{M}$ , RS1 at 10  $\mu\text{M}$ , Aphidicolin at 2  $\mu\text{g/mL}$ , A64 trifluoroacetate at 1  $\mu\text{M}$ , SB220025  
598 at 0.5  $\mu\text{M}$ , GKT136901 at 50  $\mu\text{M}$ , GW843682X at 0.5  $\mu\text{M}$ , Ro3280 at 100 nM, and UNC2170  
599 trifluoroacetate at 150  $\mu\text{M}$ . Cells were drug treated for 24 hours, harvested, washed, and recovered into  
600 fresh media. Cells were harvested for flow cytometry or amplicon sequencing 4 days post nucleofection.

601

602 qPCR

603 Between  $1e+05$  and  $2e+05$  cells were harvested and RNA extracted using Qiagen RNeasy kits (Qiagen,  
604 Venlo, Netherlands). cDNA was produced from 1  $\mu$ g of purified RNA using the iScript Reverse  
605 Transcription Supermix (Bio-Rad). qPCR reactions were performed using the SsoAdvanced Universal  
606 SYBR Green Supermix (Bio-Rad) in a total volume of 10  $\mu$ l with primers at final concentrations of 500  
607 nM. The thermocycler was set for 95°C for 2 mins and 40 cycles of 95°C for 2 sec and 55°C for 8 sec.  
608 Fold enrichment of the assayed genes over the control *ACT1B* and/or *GAPDH* loci were calculated using  
609 the  $2^{-\Delta\Delta C_t}$  method essentially as described<sup>41</sup>. Primer sequences can be found in **Document S1**.

610

### 611 Western Blotting

612 Cells were harvested and washed with PBS. Cell were lysed in 1x RIPA buffer (EMD Millipore) for 10  
613 min on ice. Samples were spun down at  $14,000 \times g$  for 15 min, and cleared protein lysates were transferred  
614 to a new tube. 20  $\mu$ g of RIPA protein lysate was resolved on a TGX anyKD gel (Bio-Rad) and semi-dry  
615 transferred (TransBlot Turbo, Bio-Rad) to nitrocellulose membranes. Membranes were blocked in 5%  
616 milk, incubated with primary antibodies in 5% milk, incubated with secondary antibodies in 5% milk, and  
617 exposed on a LiCor Odyssey CLx (Li-Cor). Antibodies used were: FLAG (Sigma F1804, 1:1000),  
618 TOMM20 (Cell Signaling 42406, 1:1000), GAPDH (cell Signaling 97166, 1:5000), phospho-S53 MCM2  
619 (Abcam ab109133, 1:1000), MCM2 (Abcam ab6153, 1:1000), 1:10,000 donkey anti-mouse IgG-IR800  
620 (Li-Cor 925-32212), 1:10,000 donkey anti-mouse IgG-IR680 (Li-Cor 925-68022), 1:10,000 donkey anti-  
621 rabbit IgG-IR800 (Li-Cor 925-32213), 1:10,000 donkey anti-rabbit IgG-IR680 (Li-Cor 925-68023).

622

### 623 T-Cell Experiments

624 Primary human T cells were isolated from two de-identified healthy human donors from residuals from  
625 leukoreduction chambers after Trima Apheresis (Blood Centers of the Pacific). Peripheral blood  
626 mononuclear cells (PBMCs) were isolated by Ficoll centrifugation using SepMate tubes (STEMCELL,  
627 per manufacturer's instructions), then T cells were further isolated from PBMCs by magnetic negative  
628 selection using an EasySep Human T Cell Isolation Kit (STEMCELL, per manufacturer's

629 instructions). Isolated T cells were cultured at 1 million cells/mL in XVivo15 medium (STEMCELL)  
630 with 5% Fetal Bovine Serum, 50 mM 2-mercaptoethanol, and 10 mM N-Acetyl L-Cystine, and stimulated  
631 for 2 days prior to electroporation with anti-human CD3/CD28 magnetic dynabeads (ThermoFisher) at a  
632 beads to cells concentration of 1:1, along with a cytokine cocktail of IL-2 at 200 U/mL (UCSF Pharmacy),  
633 IL-7 at 5 ng/mL (ThermoFisher), and IL-15 at 5 ng/mL (Life Tech). T cells were harvested from their  
634 culture vessels and magnetic anti-CD3/anti-CD28 dynabeads were removed by placing cells on an  
635 EasySep cell separation magnet for 3 minutes. Immediately prior to electroporation, de-beaded cells were  
636 centrifuged for 10 minutes at 90g, media aspirated, and resuspended in the Lonza electroporation buffer  
637 P3 using 20  $\mu$ L buffer per one million cells.

638  
639 RNPs were generated as described immediately prior to electroporation. Briefly, crRNA targeting the N-  
640 terminus of *RAB11A* (guide sequence GGUAGUCGUACUCGUCGUCG) and tracrRNAs were  
641 chemically synthesized (Edit-R, Dharmacon Horizon), and Cas9-NLS was recombinantly produced and  
642 purified (QB3 Macrolab). Lyophilized RNA was resuspended in 10 mM Tris-HCL (7.4 pH) with 150 mM  
643 KCl at a concentration of 160  $\mu$ M, and stored in aliquots at -80C. crRNA and tracrRNA aliquots were  
644 thawed, mixed 1:1 by volume, and annealed by incubation at 37C for 30 min to form an 80  $\mu$ M gRNA  
645 solution. This was further mixed 1:1 by volume with 40  $\mu$ M Cas9-NLS protein to achieve a 2:1 molar  
646 ratio of gRNA:Cas9, with final RNP concentration of 20  $\mu$ M. A long double-stranded HR template  
647 creating an N-terminal fusion protein of GFP and the *RAB11A* gene (Roth et al, Nature 2018) was  
648 generated as a PCR amplicon using KapaHiFi polymerase (Kapa Biosystems), purified by SPRI bead  
649 cleanup, and resuspended in water to 125 ng/uL as measured by light absorbance on a NanoDrop  
650 spectrophotometer (Thermo Fisher).

651  
652 50 pmol of RNP and 0.25  $\mu$ g of dsDonor were mixed for 5-10 minutes, then added to cells 3-5 minutes  
653 before electroporation. One million T-cells per well with RNP and dsDonor were electroporated using the  
654 Lonza 4D 96-well electroporation system with pulse code EH115, in biological replicate of n=3.

655 Immediately post-electroporation, prewarmed media was added to rescue the cells then each  
656 electroporation condition was split into 5 wells of a 96-well U-bottom tissue culture plate. Electroporated  
657 cells were incubated at 1 million cells/mL in final volume 200uL media with IL-2 at 500 U/mL and  
658 increasing concentrations of XL413. After 24 hours, all cells were washed in PBS, and fresh media was  
659 added containing only IL-2 at 500 U/mL. Approximately 3 days post-electroporation, cells were collected  
660 by centrifugation at 300g, media discarded, and antibody stains were added (UCHT1-CD3-PE, OKT4-  
661 CD4-PE-Cy7, RPA-T8-APC (all from BioLegend), and GhostDye780 (Tonbo)) for 20 minutes. Cells  
662 were washed, resuspended in PBS+ 1% serum (120uL per well), and then an equal volume (80uL) of each  
663 well was sampled using an Attune NxT Focusing Flow Cytometer with Autosampler attachment  
664 (ThermoFisher).

665

#### 666 FUCCI Cell Line Generation

667 K562 cells were electroporated with 40 µg pML143 donor vector containing EF1 $\alpha$ -mAG1-geminin(1-  
668 110)-P2A-mKO2-hCdt1(30-120) flanked by homology arms to AAVS1/PPP1R12C locus and 5µg each  
669 of AAVS1L and AAVS1R TALENs. Targeted cells were sorted by FACS into 96 well plates to isolate  
670 single clones. Clonal cell lines were assayed by live cell imaging and flow cytometry to verify correct  
671 correlation with fluorescence and cell cycle progression.

672

#### 673 Cell Cycle Assay/DNA Quantification Assay

674 K562 FUCCI cells were grown in complete RPMI containing Aphidicolin (2 µg/mL), Hydroxyurea (2  
675 mM) or XL413 (33 µM). Cells were harvested at indicated time points and subjected to flow cytometry.  
676 Cell cycle status was determined gating for mAG1<sup>+</sup>/mKO2<sup>-</sup> (S/G2/M), mKO2<sup>+</sup>/mAG1<sup>-</sup> (G1), mAG1<sup>+</sup>/  
677 mKO2<sup>+</sup> (early S) and mAG1<sup>-</sup>/mKO2<sup>-</sup> (early G1) cell populations. DNA content of the cells was  
678 determined using Hoechst33342 (Thermo Fisher) DNA dye. Hoechst33342 was added to cells in culture  
679 medium (final concentration 1 µg/mL) for 30 mins at 37 °C before cells were subjected to flow cytometry.

680

681 Data Availability

682 Data from CRISPRi screens will be publicly available at **[Database Location]**.

683

684 **References**

- 685 1. Lingeman, E., Jeans, C. & Corn, J. E. Production of Purified CasRNPs for Efficacious Genome  
686 Editing. *Current protocols in molecular biology / edited by Frederick M Ausubel [et al]* **120**,  
687 31.10.1–31.10.19 (2017).
- 688 2. Doudna, J. A. & Charpentier, E. Genome editing. The new frontier of genome engineering with  
689 CRISPR-Cas9. **346**, 1258096 (2014).
- 690 3. Romero, Z., DeWitt, M. & Walters, M. C. Promise of gene therapy to treat sickle cell disease.  
691 *Expert Opin Biol Ther* **18**, 1123–1136 (2018).
- 692 4. Porteus, M. H. Towards a new era in medicine: therapeutic genome editing. *Genome Biol* 1–12  
693 (2015). doi:10.1186/s13059-015-0859-y
- 694 5. Thyme, S. B. & Schier, A. F. Polq-Mediated End Joining Is Essential for Surviving DNA Double-  
695 Strand Breaks during Early Zebrafish Development. *Cell Rep* 1–21 (2016).  
696 doi:10.1016/j.celrep.2016.03.072
- 697 6. Liang, X., Potter, J., Kumar, S., Ravinder, N. & Chesnut, J. D. Enhanced CRISPR/Cas9-mediated  
698 precise genome editing by improved design and delivery of gRNA, Cas9 nuclease, and donor  
699 DNA. *J Biotechnol* **241**, 136–146 (2017).
- 700 7. Lin, S., Staahl, B. T., Alla, R. K. & Doudna, J. A. Enhanced homology-directed human genome  
701 engineering by controlled timing of CRISPR/Cas9 delivery. *eLife* **4**, (2014).
- 702 8. Richardson, C. D. *et al.* CRISPR–Cas9 genome editing in human cells occurs via the Fanconi  
703 anemia pathway. *Nat Genet* 1–13 (2018). doi:10.1038/s41588-018-0174-0
- 704 9. Gilbert, L. A. *et al.* CRISPR-Mediated Modular RNA-Guided Regulation of Transcription in  
705 Eukaryotes. **154**, 442–451 (2013).
- 706 10. Horlbeck, M. A., Gilbert, L. A., Villalta, J. E. & Adamson, B. Compact and highly active next-  
707 generation libraries for CRISPR-mediated gene repression and activation. *eLife* (2016).  
708 doi:10.7554/eLife.19760.001
- 709 11. Richardson, C. D., Ray, G. J., DeWitt, M. A., Curie, G. L. & Corn, J. E. Enhancing homology-  
710 directed genome editing by catalytically active and inactive CRISPR-Cas9 using asymmetric  
711 donor DNA. *Nat Biotechnol* (2016). doi:10.1038/nbt.3481
- 712 12. Nakanishi, K. *et al.* Human Fanconi anemia monoubiquitination pathway promotes homologous  
713 DNA repair. *Proc Natl Acad Sci USA* **102**, 1110–1115 (2005).
- 714 13. Huang, D. W., Sherman, B. T. & Lempicki, R. A. Systematic and integrative analysis of large  
715 gene lists using DAVID bioinformatics resources. *UNKNOWN* **4**, 44–57 (2008).
- 716 14. Duxin, J. P. & Walter, J. C. What is the DNA repair defect underlying Fanconi anemia? *Curr*  
717 *Opin Cell Biol* **37**, 49–60 (2015).
- 718 15. Lei, L. *et al.* APOBEC3 induces mutations during repair of CRISPR-Cas9-generated DNA  
719 breaks. *Nat. Struct. Mol. Biol.* **25**, 45–52 (2018).
- 720 16. Komor, A. C., Kim, Y. B., Packer, M. S., Zuris, J. A. & Liu, D. R. Programmable editing of a  
721 target base in genomic DNA without double-stranded DNA cleavage. *Nature* (2016).  
722 doi:10.1038/nature17946
- 723 17. Haber, J. E. Partners and pathways: repairing a double-strand break. *Trends Genet* **16**, 259–264  
724 (2000).
- 725 18. Ceccaldi, R., Rondinelli, B. & D’Andrea, A. D. Repair Pathway Choices and Consequences at the  
726 Double-Strand Break. *Trends Cell Biol* **26**, 52–64 (2016).

- 727 19. Maruyama, T. *et al.* Increasing the efficiency of precise genome editing with CRISPR-Cas9 by  
728 inhibition of nonhomologous end joining. *Nat Biotechnol* (2015). doi:10.1038/nbt.3190
- 729 20. Pannunzio, N. R., Watanabe, G. & Lieber, M. R. Nonhomologous DNA end-joining for repair of  
730 DNA double-strand breaks. *J Biol Chem* **293**, 10512–10523 (2018).
- 731 21. Roth, T. L. *et al.* Reprogramming human T cell function and specificity with non-viral genome  
732 targeting. *Nature* 1–31 (2018). doi:10.1038/s41586-018-0326-5
- 733 22. Koltun, E. S. *et al.* Discovery of XL413, a potent and selective CDC7 inhibitor. *Bioorganic &*  
734 *Medicinal Chemistry Letters* **22**, 3727–3731 (2012).
- 735 23. Roberts, B. *et al.* Systematic gene tagging using CRISPR/Cas9 in human stem cells to illuminate  
736 cell organization. *Mol Biol Cell* **28**, 2854–2874 (2017).
- 737 24. Kan, Y., Ruis, B., Takasugi, T. & Hendrickson, E. A. Mechanisms of precise genome editing  
738 using oligonucleotide donors. *Genome Research* **27**, 1099–1111 (2017).
- 739 25. DeWitt, M. A. *et al.* Selection-free genome editing of the sickle mutation in human adult  
740 hematopoietic stem/progenitor cells. *Sci Transl Med* **8**, 360ra134–360ra134 (2016).
- 741 26. Lei, M. *et al.* Mcm2 is a target of regulation by Cdc7-Dbf4 during the initiation of DNA  
742 synthesis. *Genes Dev* **11**, 3365–3374 (1997).
- 743 27. Tsuji, T., Ficarro, S. B. & Jiang, W. Essential role of phosphorylation of MCM2 by Cdc7/Dbf4 in  
744 the initiation of DNA replication in mammalian cells. *Mol Biol Cell* **17**, 4459–4472 (2006).
- 745 28. Sakaue-Sawano, A. *et al.* Visualizing Spatiotemporal Dynamics of Multicellular Cell-Cycle  
746 Progression. *Cell* **132**, 487–498 (2008).
- 747 29. Hustedt, N. & Durocher, D. The control of DNA repair by the cell cycle. *Nat Cell Biol* (2017).  
748 doi:10.1038/ncb3452
- 749 30. Maruyama, T. *et al.* Increasing the efficiency of precise genome editing with CRISPR-Cas9 by  
750 inhibition of nonhomologous end joining. *Nat Biotechnol* **33**, 538–542 (2015).
- 751 31. Song, J. *et al.* RS-1 enhances CRISPR/Cas9- and TALEN-mediated knock-in efficiency. *Nat*  
752 *Commun* **7**, 1–7 (2016).
- 753 32. Yu, C. *et al.* Small molecules enhance CRISPR genome editing in pluripotent stem cells. *Cell*  
754 *Stem Cell* **16**, 142–147 (2015).
- 755 33. Canny, M. D. *et al.* Inhibition of 53BP1 favors homology-dependent DNA repair and increases  
756 CRISPR-Cas9 genome-editing efficiency. *Nat Biotechnol* **36**, 95–102 (2018).
- 757 34. Morales, J. C. *et al.* 53BP1 and p53 synergize to suppress genomic instability and  
758 lymphomagenesis. *Proc Natl Acad Sci USA* **103**, 3310–3315 (2006).
- 759 35. Gutschner, T., Haemmerle, M., Genovese, G., Draetta, G. F. & Chin, L. Post-translational  
760 Regulation of Cas9 during G1 Enhances Homology-Directed Repair. *Cell Rep* **14**, 1555–1566  
761 (2016).
- 762 36. Howden, S. E. *et al.* A Cas9 Variant for Efficient Generation of Indel-Free Knockin or Gene-  
763 Corrected Human Pluripotent Stem Cells. *Stem Cell Reports* **7**, 508–517 (2016).
- 764 37. Anders, C. & Jinek, M. In vitro enzymology of Cas9. *Meth Enzymol* **546**, 1–20 (2014).
- 765 38. Pinello, L. *et al.* Analyzing CRISPR genome-editing experiments with CRISPResso. *Nat*  
766 *Biotechnol* **34**, 695–697 (2016).
- 767 39. Li, W. *et al.* The EMBL-EBI bioinformatics web and programmatic tools framework. *Nucleic*  
768 *Acids Research* **43**, W580–4 (2015).
- 769 40. Kampmann, M., Bassik, M. C. & Weissman, J. S. Functional genomics platform for pooled  
770 screening and generation of mammalian genetic interaction maps. *UNKNOWN* **9**, 1825–1847  
771 (2014).
- 772 41. Livak, K. J. & Schmittgen, T. D. Analysis of relative gene expression data using real-time  
773 quantitative PCR and the 2(-Delta Delta C(T)) Method. *Methods* **25**, 402–408 (2001).  
774
